# Supplementary material for: A Proof of Concept, Phase II Randomized European Trial, on the Efficacy of ALF-5755, a Novel Extracellular Matrix-Targeted Antioxidant in Patients with Acute Liver Diseases
Source: PubMed Central journal article supplement (PMC4794150; doi:10.1371/journal.pone.0150733), 2016-03-16
Supplement: pone.0150733.s006.pdf [file pone.0150733.s006.pdf]

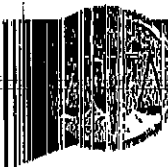

Hôpital de Bicêtre – 78 rue du général Leclerc – 94275 Le Kremlin  
Bicêtre Cedex

Président : Jacques CARRE – Secrétaire : Brigitte PILATE

Projet de Recherche N° : **10-016**

Kremlin Bicêtre le 12 juillet 2010

Le Comité a été saisi le 25 mai 2010

Madame ERNAULT-ROSEAU de ORION Santé pour le compte du promoteur ALLIANT  
INNOVATION – 320 rue Saint Honoré – 75001 PARIS concernant le projet de recherche  
intitulé :

**METHODE MULTICENTRIQUE, RANDOMISEE, EN DOUBLE AVEUGLE, CONTROLLEE  
CONTRE PLACEBO EVALUANT L'EFFICACITE ET LA TOLERANCE DE L'ALF-5755 CHEZ  
LES PATIENTS PRESENTANT UNE HEPATITE AIGUE SEVERE OU UNE HEPATITE  
PULMINANTE NON LIEE AU PARACETAMOL »**

**« A MULTICENTRE, DOUBLE-BLIND, RANDOMIZED, PLACEBO-CONTROLLED STUDY  
TO EVALUATE THE EFFICACY AND THE SAFETY OF ALF-5755 IN PATIENTS WITH  
NONACETAMINOPHEN SEVERE ACUTE HEPATITIS AND EARLY STAGE ACUTE LIVER  
FAILURE »**

(Référence du promoteur : N° ALF-5755\_P2\_ALF-2010-020657-14)

dont le coordonnateur national est le Professeur SAMUEL – Centre Hépatobiliaire – Hôpital Paul  
Brousse – 12 avenue Paul Vaillant Couturier – 94804 VILLEJUIF CEDEX

Le comité a examiné les informations relatives à ce projet (version 01 du 7 mai 2010 AVEC  
Addendum 1 du 24 juin 2010) et les réponses que vous lui avez apporté issues des questions de la  
première lecture lors des séances du 2 juin 2010 et du 7 juillet 2010 avec lettre d'information et de  
consentement pour le patient version française 1.1 du 24 juin 2010, lettre d'information et de  
consentement pour la personne de confiance version française 1.1 du 24 juin 2010 et la liste des  
centres participants à l'étude du 18 mai 2010

### Membres présents lors de la délibération de votre protocole

Premier Collège :

- Recherche biomédicale : V. GAJDOS, pédiatre (T), A. LAFLAUME,  
épidémiologiste (T) M. PUCHEAULT (T) et M. BOTTLAENDER (S)
- Pharmacien Hospitalier : A. M. TABURET (T)
- Infirmière : C. ASTOUL (T)

Deuxième collège :

- Ethique : P. CASOURANG (S)
- Psychologue : S. SCHWAB (T)
- Travailleur social : A. M. PETIT (S)
- Juriste : P. BOISSY (T) et V. A. LAFOY (T)
- Associations agréées : J. P. ESCANDE (S)

Le Comité :

- .. considérant l'intérêt du projet de recherche
- .. le respect d'une méthodologie adaptée à la question posée
- .. considérant le respect d'un consentement libre et éclairé formulé au regard  
d'une note d'information adaptée
- .. considérant la balance bénéfice risque pour le patient positive

**AVIS FAVORABLE sans restriction**

Docteur Vincent GAJDOS  
Président de la séance du 7 juillet 2010
