# Supplementary material for: A Proof of Concept, Phase II Randomized European Trial, on the Efficacy of ALF-5755, a Novel Extracellular Matrix-Targeted Antioxidant in Patients with Acute Liver Diseases
Source: PubMed Central journal article supplement (PMC4794150; doi:10.1371/journal.pone.0150733), 2016-03-16
Supplement: pone.0150733.s008.pdf [file pone.0150733.s008.pdf]

## Statistical Analysis Plan

### ALF-5755\_P2\_ALF

**A multicentre, double-blind, randomised, placebo-controlled study to evaluate the efficacy and the safety of ALF-5755 in patients with nonacetaminophen severe acute hepatitis and early stage acute liver failure**

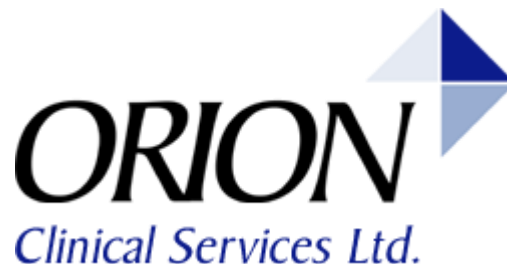

Prepared for:

**Alfact Innovation**

Prepared by:

**ORION Clinical Services Ltd.**

7 Bath Road, Slough  
Berkshire SL1 3UE UK

Tel: +44 (0) 1753 578080 Fax: +44 (0) 1753 578081

CONFIDENTIAL

**Version**  
Version 2 Final

**Author**  
Susan Bogle

## Statistical Analysis Plan

### ALF-5755\_P2\_ALF

**A multicentre, double-blind, randomised, placebo-controlled study to evaluate the efficacy and the safety of ALF-5755 in patients with nonacetaminophen severe acute hepatitis and early stage acute liver failure**

**Author:** Susan Bogle  
**Version:** 2 Final

The undersigned have reviewed and revised this SAP and find it to be consistent with the study requirements:

---

Paul Amouyal, President, Alfact Innovation

---

Date

---

Susan Bogle, Director of Biometrics, ORION Clinical Services Ltd.

---

Date

## TABLE OF CONTENTS

|           |                                          |           |
|-----------|------------------------------------------|-----------|
| <b>1</b>  | <b>INTRODUCTION</b>                      | <b>7</b>  |
| 1.1       | General                                  | 7         |
| 1.2       | Changes from Protocol                    | 7         |
| 1.3       | Changes from Previous Version of the SAP | 7         |
| <b>2</b>  | <b>STUDY OBJECTIVES</b>                  | <b>7</b>  |
| <b>3</b>  | <b>STUDY DESIGN</b>                      | <b>7</b>  |
| 3.1       | Overview                                 | 7         |
| 3.2       | Study Timepoints                         | 8         |
| 3.3       | Inclusion and Exclusion Criteria         | 8         |
| 3.4       | Sample Size Considerations               | 8         |
| 3.5       | Randomisation                            | 9         |
| <b>4</b>  | <b>STUDY VARIABLES AND COVARIATES</b>    | <b>9</b>  |
| 4.1       | Primary Variable                         | 9         |
| 4.2       | Secondary Efficacy Variables             | 9         |
| 4.3       | Exploratory Efficacy Variables           | 10        |
| 4.4       | Safety Variables                         | 10        |
| 4.5       | Pharmacokinetic Variables                | 11        |
| 4.6       | Other Outcome Variables                  | 11        |
| <b>5</b>  | <b>DEFINITIONS</b>                       | <b>11</b> |
| <b>6</b>  | <b>STUDY POPULATIONS</b>                 | <b>11</b> |
| 6.1       | Safety Population                        | 11        |
| 6.2       | Intent-to-Treat (ITT) Population         | 12        |
| 6.3       | Per Protocol (PP) Population             | 12        |
| 6.4       | PK Population                            | 12        |
| <b>7</b>  | <b>SAFETY MONITORING</b>                 | <b>12</b> |
| <b>8</b>  | <b>INTERIM ANALYSES</b>                  | <b>12</b> |
| <b>9</b>  | <b>DATA</b>                              | <b>12</b> |
| 9.1       | CRF Data                                 | 12        |
| 9.2       | External Data                            | 13        |
| 9.2.1     | PK Data                                  | 13        |
| 9.2.2     | CK18 Data and Other Biomarkers           | 13        |
| 9.3       | Randomisation list                       | 13        |
| 9.4       | Programming and Data Review              | 13        |
| <b>10</b> | <b>STATISTICAL METHODS</b>               | <b>13</b> |
| 10.1      | General Principles                       | 13        |
| 10.2      | Missing Data                             | 14        |
| 10.3      | Pooling of Sites                         | 14        |
| 10.4      | Multiple Comparisons                     | 14        |
| 10.5      | Subgroup Analyses                        | 14        |
| 10.6      | Statistical Issues                       | 14        |
| <b>11</b> | <b>STATISTICAL OUTPUT</b>                | <b>15</b> |
| 11.1      | Patient Disposition                      | 15        |
| 11.2      | Demographic and Baseline Characteristics | 15        |

|           |                                                      |           |
|-----------|------------------------------------------------------|-----------|
| 11.3      | Medical History and Current Medical Conditions ..... | 15        |
| 11.4      | Prior and Concomitant Medication .....               | 15        |
| 11.5      | Concomitant Procedures and Surgery .....             | 16        |
| 11.6      | Study Drug Exposure .....                            | 16        |
| 11.7      | Efficacy Analyses .....                              | 16        |
| 11.7.1    | Primary Variable .....                               | 16        |
| 11.7.2    | Secondary Variables.....                             | 17        |
| 11.8      | Evaluation of Exploratory Endpoint(s) .....          | 17        |
| 11.9      | Subgroup Analyses .....                              | 18        |
| 11.10     | Post-hoc Exploratory Analyses .....                  | 18        |
| 11.11     | PK Analyses .....                                    | 18        |
| 11.11.1   | Plasma Concentration Data .....                      | 18        |
| 11.11.2   | PK Parameters .....                                  | 19        |
| 11.12     | Safety Analyses.....                                 | 19        |
| 11.12.1   | Adverse Events .....                                 | 19        |
| 11.12.2   | Laboratory Data.....                                 | 20        |
| 11.12.3   | Anti-ALF-5755 antibodies.....                        | 20        |
| 11.12.4   | Clinical Examination .....                           | 20        |
| 11.12.5   | Vital Signs .....                                    | 20        |
| 11.12.6   | Electrocardiogram .....                              | 20        |
| 11.12.7   | Arterial Blood Gas with Lactates .....               | 21        |
| <b>12</b> | <b>VALIDATION.....</b>                               | <b>21</b> |
| <b>13</b> | <b>LITERATURE CITATIONS/REFERENCES .....</b>         | <b>21</b> |
| <b>14</b> | <b>LIST OF TABLES, FIGURES AND LISTINGS.....</b>     | <b>22</b> |
| 14.1      | List of Tables .....                                 | 22        |
| 14.2      | List of Figures .....                                | 24        |
| 14.3      | List of Listings.....                                | 25        |
| <b>15</b> | <b>SHELLS FOR TABLES, FIGURES AND LISTINGS .....</b> | <b>26</b> |
| <b>16</b> | <b>STUDY FLOW CHART .....</b>                        | <b>94</b> |

**GLOSSARY OF ABBREVIATIONS**

|                  |                                              |
|------------------|----------------------------------------------|
| %CV              | Coefficient of Variation                     |
| Abs              | Antibodies                                   |
| AE               | Adverse Event                                |
| ALF              | Acute Liver Failure                          |
| ALT              | Alanine Transaminase (also SGPT)             |
| AM               | Arithmetic Mean                              |
| ANA              | Antinuclear Antibody                         |
| anti-LKM         | Antibodies to Liver and Kidney Microsomes    |
| AP               | Alkaline Phosphatase                         |
| ASMA             | Anti-smooth Muscle Antibody                  |
| AST              | Aspartate Transaminase (also SGOT)           |
| ATC              | Anatomical Therapeutic Chemical              |
| AUC              | Area Under the Plasma Concentration Curve    |
| BMI              | Body Mass Index                              |
| BP               | Blood Pressure                               |
| CI               | Confidence Interval                          |
| CK               | Cytokeratin                                  |
| C <sub>max</sub> | Maximum Observed Plasma Concentration        |
| CRA              | Clinical Research Associate                  |
| CRF              | Case Report Form                             |
| CS               | Clinically Significant                       |
| CSR              | Clinical Study Report                        |
| CTC              | Common Toxicity Criteria                     |
| CTCAE            | Common Toxicity Criteria Adverse Event       |
| D                | Day                                          |
| DSMB             | Data Safety Monitoring Board                 |
| ECG              | Electrocardiogram                            |
| FV               | Factor V                                     |
| GCS              | Glasgow Coma Scores                          |
| GGT              | Gamma-glutamyl-transferase                   |
| GM               | Geometric Mean                               |
| H                | Hour                                         |
| HAV              | Hepatitis A Virus                            |
| HBV              | Hepatitis B Virus                            |
| hCG              | Human Chorionic Gonadotropin                 |
| HCV              | Hepatitis C Virus                            |
| HDV              | Hepatitis D Virus                            |
| HE               | Hepatic Encephalopathy                       |
| HEV              | Hepatitis E Virus                            |
| HEENT            | Head, Eyes, Ears, Nose, Throat               |
| HIV              | Human Immunodeficiency Virus                 |
| HSV              | Herpes Simplex Virus                         |
| ICH              | International Conference on Harmonisation    |
| Ig               | Immunoglobulin                               |
| INR              | International Normalised Ratio               |
| ITT              | Intention-to-treat                           |
| k                | Terminal Rate Constant                       |
| LNR              | Limit of Hospital Laboratory Normal Range    |
| MedDRA           | Medical Dictionary for Regulatory Activities |
| MELD             | Model for End-Stage Liver Disease            |
| N                | Number of Patients                           |
| n                | Number of Events                             |

|              |                                                               |
|--------------|---------------------------------------------------------------|
| NCS          | Not Clinically Significant                                    |
| PCR          | Polymerase Chain Reaction                                     |
| PICD         | Patient Informed Consent Document                             |
| PK           | Pharmacokinetics                                              |
| PP           | Per Protocol                                                  |
| PR           | Prothrombin Ratio                                             |
| PT           | Preferred Term                                                |
| QC           | Quality Control                                               |
| R            | Accumulation Ratio                                            |
| RBC          | Red Blood Cell                                                |
| SAE          | Serious Adverse Event                                         |
| SAH          | Severe Acute Hepatitis                                        |
| SAP          | Statistical Analysis Plan                                     |
| SD           | Standard Deviation                                            |
| SOC          | System Organ Class                                            |
| $t_{1/2}(h)$ | Terminal phase half-life                                      |
| TEAE         | Treatment-Emergent Adverse Event                              |
| $T_{max}$    | Time from Dosing to the Maximum Observed Plasma Concentration |
| VZV          | Varicella Zoster Virus                                        |
| WBC          | White Blood Cell                                              |
| WHO          | World Health Organisation                                     |
| WHODD        | World Health Organisation Drug Dictionary                     |

## 1 INTRODUCTION

### 1.1 General

This statistical analysis plan (SAP) describes the statistical methods to be used during the reporting and analyses of data collected under Alfact Innovation Protocol ALF-5755\_P2\_ALF and should be read in conjunction with the study protocol and case report form (CRF).

This version of the plan has been developed using the protocol Version 4 dated 13 February 2012 and CRF dated 15 July 2010 with revised page 4 dated on 11 March 2011, page 9 dated on 15 Sept. 2011, page 58 dated on 11 March 2011, page 63 dated on 15 Sept. 2011 and page 77 dated 16 Sept 2010. Any further changes to the protocol or CRF will be reviewed for potential impact on the SAP which will be amended if it is deemed necessary.

At the time of writing this version of the SAP, recruitment is ongoing.

Draft 1 was reviewed by the ORION project manager, medical writer and independent statistician. The analysis plan was finalised and approved by the sponsor prior to database lock. Additional exploratory analyses may be performed following review of the results.

### 1.2 Changes from Protocol

Model for End-Stage Liver Disease (MELD) has been added as an additional secondary efficacy variable as detailed in Section 4.2.

### 1.3 Changes from Previous Version of the SAP

The use of planned assessment times and LNR=80 in the derivations of the primary efficacy variable has been clarified.

The modification using baseline when H0 was not recorded for the primary efficacy variable has been defined.

Only hepatitis etiology will be included as a factor in the efficacy analyses.

Details of the survival analysis have been clarified.

## 2 STUDY OBJECTIVES

Primary:

- to evaluate the efficacy of ALF-5755 versus placebo, measured by rate of change of prothrombin ratio (PR) during the 72 hours following treatment initiation, in patients with nonacetaminophen Severe Acute Hepatitis (SAH) and early stage Acute liver failure (ALF).

Secondary:

- to evaluate the safety and tolerability of ALF-5755 versus placebo in patients with nonacetaminophen SAH and early stage ALF.
- to determine the pharmacokinetic (PK) parameters of ALF-5755 versus placebo in patients with nonacetaminophen SAH and early stage ALF.

## 3 STUDY DESIGN

### 3.1 Overview

This is a prospective, multicentre, double-blind, placebo-controlled study.

Male and female adult patients with nonacetaminophen severe acute hepatitis and early stage acute liver failure will receive slow intravenous infusions of 10 mg (25 ml) of ALF-5755 or placebo

(physiological saline solution: 0.9% NaCl) over 10 minutes using automatic syringes. The infusions will be repeated every 12 hours for 3 days (6 doses: H0, H12, H24, H36, H48 and H60). Patients will then be followed until Day 21.

A minimum of 60 adult male and female patients with nonacetaminophen SAH and early stage ALF will be recruited into the study and randomised in the ratio 1:1.

Recruitment will continue until 60 patients are evaluable, i.e. have no major deviation impacting the evaluability of the primary endpoint and have PR assessments allowing rate of change of PR calculation.

### 3.2 Study Timepoints

The time between baseline assessments, randomisation and first injection should be as short as possible and should not exceed 48 hours. The treatment phase consists of 3 days of 12 hourly treatments (6 infusions) with the primary endpoint at H72. Follow up is at H84, D8 and D21.

| Visit               | Day | Hour              | Window   |
|---------------------|-----|-------------------|----------|
| Screening/Baseline  |     | Pre-randomisation |          |
| Infusion            |     | H0                | ± 10 min |
| Infusion            |     | H12               | ± 10 min |
| Infusion            |     | H24               | ± 10 min |
| Infusion            |     | H36               | ± 10 min |
| Infusion            |     | H48               | ± 10 min |
| Infusion            |     | H60               | ± 10 min |
| Follow up (primary) |     | H72               | ± 10 min |
| Follow up           |     | H84               | ± 10 min |
| Follow up           | D8  |                   | ± 2 days |
| Follow up           | D21 |                   | ± 2 days |

See Section 16 for the Study Schedule.

### 3.3 Inclusion and Exclusion Criteria

To be eligible for inclusion into this study, each patient must fulfill all inclusion criteria and not violate any exclusion criteria (for the protocol under which they are entered) during screening prior to randomisation. Details of the inclusion and exclusion criteria are presented in the protocol and amendments.

### 3.4 Sample Size Considerations

The sample size has been determined from the Beaujon series for patients that fulfilled the inclusion criteria for this study. The mean (0.22) and standard deviation (0.27) of the PR slope (0-72H) from this series were assumed for the placebo group. The standard deviation for the active group was assumed to be 0.32. (See the protocol for the justification of this assumption.) Based on these assumptions, a sample of size 60 (30 per group) will have 80% power to detect a treatment effect of doubling the PR slope (mean slope for ALF-5755 = 0.44) with 5% significance using a 2-sided 2-sample t-test.



Considering the recruiting rate of eligible patients in the 2 major centres (Beaujon and CHB) and the 8 other centres planned to participate to the trial, this sample size should be reached within 18 months.

### 3.5 Randomisation

Randomisation will be in the ratio 1:1 stratified by site. Randomisation numbers will be allocated to patients sequentially within site following eligibility assessment and consent. Allocation to treatment will be by the site pharmacist (or designee) opening a randomisation allocation envelope.

The randomisation will be programmed by the study statistician at ORION. The final list and the allocation envelopes will be generated by the unblinded statistician.

## 4 STUDY VARIABLES AND COVARIATES

### 4.1 Primary Variable

Prothrombin Ratio (PR) will be measured and recorded on the CRF at baseline, H0 before 1st infusion, H12 before 2nd infusion, H24 before 3rd infusion, H36 before 4th infusion, H48 before 5th infusion, H60 before 6th infusion, H72, H84, D8 (after H0), D21 (after H0) or premature discontinuation.

The primary variable for statistical comparison between treatment groups will be **rate of change of PR during 72 hours following treatment initiation** calculated as:

$$(\text{PR at H72} - \text{PR at H0 pre-dose}) / 72.$$

Assessments will be included for the primary (ITT) analysis whether or not they are within the visit window.

If PR reaches the limit of the hospital laboratory normal range of values (LNR = 80) before H72, the formula will be modified as follows:

$$(80 - \text{PR at H0 pre-dose}) / \text{nominal}^1 \text{ time to first reach 80}$$

If the patient has no recorded PR at H72 but does have an earlier post-H0 assessment, the formula will be modified as follows:

$$(\text{Last recorded PR} - \text{PR at H0 pre-dose}) / \text{nominal}^2 \text{ time to last recorded PR}$$

If the patient has no recorded PR at H0 but does have an earlier pre-H0 assessment (baseline), the relevant formula above will be modified to use PR at baseline instead of PR at H0 pre-dose, and to add 12 hours to the time in the denominator to reflect the time between baseline and H0<sup>3</sup>.

If the patient withdraws early, an extra PR sampling at time of withdrawal will be done if possible, and used as the last recorded value of PR in this formula.

It is expected that all patients will have at least one post-baseline assessment of PR. If any patients have no post-baseline assessment of PR, a decision will be made on a case by case basis at the blind data review meeting before database lock whether or not to impute values for the analysis.

### 4.2 Secondary Efficacy Variables

MELD will be calculated from serum bilirubin (mg/dL), International Normalised Ratio (INR) and serum creatinine (mg/dL) using the formula:

<sup>1</sup> Planned assessment time, i.e. 12 hours, 24 hours, etc

<sup>2</sup> Planned assessment time, i.e. 12 hours, 24 hours, etc

<sup>3</sup> This applied to just one patient (1205), whose baseline assessment was reported by Alfact to have been done 12 hours pre-dose. The decision was made before unblinding. If the patient is on placebo, this will give a reliable estimate of rate of change of PR; if the patient is on ALF5755, it will give a conservative estimate.

$$\text{MELD} = 3.78 \ln(\text{bilirubin}) + 11.2 \ln(\text{INR}) + 9.57 \ln(\text{creatinine}) + 6.43$$

with the following modifications:

- Any value (bilirubin, INR or creatinine) less than 1 will be scored as 1
- If the patient has been dialyzed twice within the previous 7 days, then the value of creatinine used will be 4.0 mg/dL. (Evidence of no dialysis before enrolment will be based on Exclusion Criterion 9. If dialysis is performed after enrolment, it will be recorded on the concomitant procedures page of the CRF. This information will be used to determine the appropriate value for creatinine to use in the formula.)

The following secondary efficacy variables will be analysed:

- Rate of change of Factor V (FV) during 72 hours following treatment initiation; defined as for the primary including the modifications
- Rate of change of International Normalised Ratio (INR) during 72 hours following treatment initiation; defined as for the primary including the modifications
- Rate of change of MELD during 72 hours following treatment initiation; defined as for the primary including the modifications
- Rate of change of Alanine Transaminase (ALT) plasma level during 72 hours following treatment initiation; defined as for the primary including the modifications
- Rate of change of Aspartate Transaminase (AST) plasma level during 72 hours following treatment initiation; defined as for the primary including the modifications
- Change of Hepatic Encephalopathy (HE) grade during 72 hours following treatment initiation
- Overall survival rate at D21
- Transplant-free survival rate at D21
- Liver transplantation at D21
- Length of hospitalisation (days)

#### 4.3 Exploratory Efficacy Variables

The following exploratory efficacy variable will be analysed:

- Total and cleaved Cytokeratin (CK) 18 plasma levels
- Other biomarkers

#### 4.4 Safety Variables

Safety will be evaluated by the following parameters:

- Adverse events (AEs) recorded from the timepoint that the Patient Informed Consent Document (PICD) has been signed
- Safety laboratory assessments, including haematology (haemoglobin, hematocrit, complete WBC count, red blood cell [RBC] count platelet count); biochemistry (fibrinogen, alkaline phosphatase, gamma-glutamyltransferase [GGT], total and conjugated bilirubin, ammonia, albumin, creatinine, urea, sodium, potassium, chloride, bicarbonates, lactates, calcium, magnesium, phosphorus, glucose, total proteins, amylase and lipase)
- Vital signs (body temperature, systolic and diastolic blood pressure, heart rate and respiratory rate)
- Physical examination

- ECG
- Recording of concomitant medication
- Beta human chorionic gonadotropin (hCG) blood pregnancy test for females of child-bearing potential

#### 4.5 Pharmacokinetic Variables

ALF-5755 plasma concentrations will be performed in the first 16 patients included at Paul Brousse Hospital and Beaujon Hospital and other centres if necessary for adequate recruitment. Baseline plasma concentrations measured at H0, reflecting endogenous HIP/PAP levels will be subtracted from each ALF-5755 plasma concentration. PK samples will be collected at the following times:

- 1<sup>st</sup> infusion: H0 just before 1st infusion, 10 minutes (end of infusion), H1, H2, H6, H12 (just before 2<sup>nd</sup> infusion)
- 5<sup>th</sup> infusion: H48 (just before 5th infusion)
- 6<sup>th</sup> infusion: H60 just before 6th infusion, H60 10 minutes (end of infusion), H61, H62, H66, H72, H84

PK parameters ( $C_{max}$ ,  $t_{max}$ ,  $AUC_{0-12}$ ,  $AUC_{0-t}$  and  $t_{1/2}$ ) of ALF-5755 will be determined from plasma concentrations measured after 1<sup>st</sup> infusion (H0) and after the 6<sup>th</sup> infusion (H60) and provided to ORION CS for statistical analysis.  $T_{max}$  is expected to just reflect the time of the sample collection at the end of infusion.

All PK blood samples (of 5 mL each) will always be taken from the opposite arm to the one where study treatment is infused.

#### 4.6 Other Outcome Variables

None

## 5 DEFINITIONS

**Study Drug.** Study drug is taken to mean either ALF-5755 or placebo.

**Baseline.** Baseline for efficacy and safety analyses is defined by patient and by variable as the last non-missing value before the first dose of study drug. This will normally be the pre-dose assessment at the H0 visit but if this assessment is missing then the assessment at the Baseline visit will be used instead if available.

**Treatment Exposure.** Treatment exposure is the total volume of all infusions at H0, H12, H24, H36, H48 and H60.

**Protocol Deviations and Violations.** The terms “protocol deviation” and “protocol violation” are considered interchangeable in the context of the statistical analysis, and refer to any deviation recorded by the Project Manager or Clinical Research Associate (CRA), or detected by Data Management or by Statistical programming checks as described in Section 9.4.

## 6 STUDY POPULATIONS

### 6.1 Safety Population

The Safety Population will include all patients who are randomised to treatment and receive at least one administration of ALF-5755 or placebo. Subjects who receive the wrong treatment will be analysed as treated when using the Safety Population.

## 6.2 Intent-to-Treat (ITT) Population

The ITT Population will include all patients in the Safety Population who provide at least one post-dose efficacy assessment or for whom the primary endpoint is imputed. (See Section 4.1.) Subjects who receive the wrong treatment will be analysed as randomised when using the ITT Population.

## 6.3 Per Protocol (PP) Population

The PP Population will include all patients in the ITT Population who complete the double-blind treatment phase of the study with no major protocol deviations (i.e. impacting the primary endpoint).

The following deviations will be programmed initially:

1. Failed any inclusion/exclusion criteria (as entered on the relevant page of the CRF)
2. Did not receive at least 5 complete injections (80% of the treatment)
3. Did not attend visits within the visit windows
4. Premature termination of the study due to protocol violation, including non compliance with study procedures

Definition of major/minor deviations and allocation to the study populations will be agreed before database lock and unblinding.

The primary analysis will be repeated using the PP Population. If there are no exclusions from the ITT Population, the table using the PP Population will not be produced.

## 6.4 PK Population

The PK Population is defined as those patients who have any PK results.

# 7 SAFETY MONITORING

The Data Safety Monitoring Board (DSMB) was set up to periodically evaluate the overall safety profile and review the adverse reactions experienced by each individual patient.

It was planned to report safety data to the DSMB following treatment completion (D3) in the first 2, 4, 10, 20, 30, 40, 50 patients with additional meetings if necessary. In practice this schedule was varied slightly.

Details about the DSMB composition and meeting information are described in the DSMB charter.

The DSMB will be blinded. Exceptionally the DSMB may request unblinded data.

At each scheduled meeting, the DSMB will review disposition, demographic and safety data.

# 8 INTERIM ANALYSES

No interim analysis is planned.

# 9 DATA

## 9.1 CRF Data

CRF data will be provided by ORION data management to the statistics department as ORION standard raw SAS datasets. Populated datasets will be available when programming starts. These may contain dummy data if real data is not yet available.

## 9.2 External Data

### 9.2.1 PK Data

An Excel spreadsheet, containing patient id information and PK sample times (nominal and actual) for patients who have PK samples taken, will be provided to Atlanbio by ORION Data Management. This will be populated by Atlanbio with dummy ALF-5755 and anti-ALF-5755 concentration data and returned to ORION to upload to a SAS dataset for programming of the statistical outputs. The updated spreadsheet showing all patients on the clinical database (without any PK data) will be sent to Atlanbio immediately following database lock and unblinding of the study. Atlanbio will populate this with the final PK concentration data and again send to ORION to allow production of the final outputs. The PK parameters for ALF-5755 will be derived by ORION and saved as a SAS dataset for programming of the statistical outputs.

### 9.2.2 CK18 Data and Other Biomarkers

An Excel spreadsheet containing patient id information and CK-18 sample times (nominal and actual) will be provided to Inserm by ORION Data Management. This will be populated by Inserm with dummy CK-18 data and returned to ORION to upload to a SAS dataset for programming of the statistical outputs. The updated spreadsheet showing all patients on the clinical database (without any CK-18 data) will be sent to Inserm immediately following database lock and unblinding of the study. Inserm will populate this with the final CK-18 data and again send to ORION to allow production of the final outputs.

Other biomarker parameters will be included in the spreadsheet provided by Inserm in the same format.

## 9.3 Randomisation list

The randomisation list will be uploaded to a SAS dataset following database lock.

## 9.4 Programming and Data Review

Once the SAP is finalised, programming and review of analysis datasets, tables, figures and listings will be ongoing during the data management of the study. Outputs for the DSMB will be reviewed, but not fully QCd.

When the final data is considered clean, key listings (to be agreed) will be run and distributed to the study team for review. A blind data review meeting will be held to discuss the outcome of this review, the imputations for the primary endpoint and the protocol deviations. Once all data issues have been resolved and the analysis populations approved, the database will be locked. The final run of outputs and quality control (QC) will then take place. This will be done in 2 stages: The main batch will be delivered first; the remaining outputs (identified in Section 14) will be programmed and delivered on request by Alfact.

# 10 STATISTICAL METHODS

## 10.1 General Principles

All statistical methods will be based on the International Conference on Harmonisation (ICH) E9 document "Statistical Principles for Clinical Trials".

Data will be summarised by treatment group. A total column showing all patients will be included for baseline and safety summaries. Where appropriate, data will also be summarised by visit. The format of the summaries is defined in the shells at the end of this document.

In summary and analysis tables of continuous variables, standard descriptive statistics (N, mean, standard deviation [SD], median, minimum and maximum) will be presented. 95% confidence

Interval (CI) will be presented in the statistical analysis outputs as appropriate. For PK summaries, arithmetic mean (AM), geometric mean (GM) and coefficient of variation (%CV) will be used to summarise the data. The minimum and maximum statistics will be presented in summary tables to the same number of significant figures as the original data. The mean/AM, median, GM, CI and SD will be presented to one more significant figure than the original data.

In summary tables of categorical variables, the number of non-missing observations by category will be presented with percentages. The number of missing observations will also be presented when non-zero. The denominator for each percentage will be the number of non-missing observations within the analysis set and treatment group (unless otherwise specified). All percentages will be presented to one decimal place.

Patient line plots will use actual time on the time axis. Mean plots will use a linear time scale for the nominal times of the visits and will be labeled by visit.

Classifications of medical history, concomitant medication and adverse events will be sorted alphabetically within the summary tables.

CRF data collected will be presented within data listings. The data listings will be sorted by treatment group, country, centre number, patient number and visit/week/day. Visits outside the visit windows will be identified within the listings.

The date format for all output presentations will be 'ddMMMyyyy'.

All statistical analysis will be performed using SAS 9.2 or higher.

All hypothesis testing will be carried out at the 5% (2-sided) significance level unless stated otherwise.

P-values will be rounded to four decimal places. P-values less than 0.0001 will be reported as <0.0001 in tables.

If any of the assumptions underlying the formal statistical methods proposed are violated during the analysis on the final data, alternative statistical methods will be used and any changes documented in the statistical methods section of the clinical study report (CSR), including the rationale for use.

## **10.2 Missing Data**

The imputations/modifications to be used for missing data are defined in Sections 4.1 and 4.2.

## **10.3 Pooling of Sites**

Sites will be pooled for all analyses. There will be no adjustment for centre effect or treatment by centre interaction.

## **10.4 Multiple Comparisons**

There will be no corrections to nominal p-values for multiple comparisons.

## **10.5 Subgroup Analyses**

Subgroups will be defined based on initial PR, hepatitis etiology, hepatic encephalopathy and N-acetyl cysteine treatment (from the concomitant medication page of the CRF). (See Section 11.9.)

## **10.6 Statistical Issues**

None

## 11 STATISTICAL OUTPUT

General principles for layout of the statistical output are described in Section 10.1, including specification of the table columns, and these are illustrated for each unique table in the table shells in Section 15. For clarity and brevity in this document the phrase “by treatment group” is understood for all summaries and is not included within the text of this section.

### 11.1 Patient Disposition

Information about screening failures will be provided by the project manager and presented in the CSR as a brief summary of the most frequent reasons for failure.

The patient disposition table will summarise the following data for all available subjects:

- The number (%) of patients in the Safety Population
- The number (%) of patients in the ITT Population
- The number (%) of patients in the PP Population
- The number (%) of patients who completed the study

The number (%) of patients who withdraw from the study and the main reason for withdrawal will be summarised.

A listing of all patients with protocol deviations will be presented. A data listing presenting the eligibility for the analysis sets for each patient will also be presented.

### 11.2 Demographic and Baseline Characteristics

Age will be calculated using Date of Birth (DOB) and Date of first treatment (H0 Visit) and presented as age at last birthday as an integer.

BMI is the patient's body weight in kilograms divided by the square of the patient's height in metres.

Age, gender, race, height, weight and BMI will be summarised using the ITT Population.

The following baseline factors will also be summarized using the ITT Population:

- Hepatitis etiology (Viral hepatitis A / Viral Hepatitis B / Viral Hepatitis E / Autoimmune hepatitis / Other etiology / Undetermined etiology / Drug-induced etiology)
- Hepatic encephalopathy grade (0 / I / II / III / IV)<sup>4</sup>
- N-acetyl cysteine treatment (yes / no)

Other parameters collected at baseline will be listed only.

### 11.3 Medical History and Current Medical Conditions

The number (%) of patients with at least one past or ongoing condition will be presented and broken down by body system using the ITT Population.

### 11.4 Prior and Concomitant Medication

All medications taken by patients on entry to the study or during the study will be recorded in the CRF. Medications will be classified using the version of the World Health Organisation Drug Dictionary (WHODD) coding dictionary defined in the Data Handling Manual. The Anatomical Therapeutic Chemical (ATC) Classification and WHO-DRUG Preferred Term (PT) will be used to list and summarise the data.

---

<sup>4</sup> Only classifications 0, I and II should be represented at baseline

**Prior medications** are defined as medication that started and stopped before Day 1. Only medications where the stop date is prior to Day 1 will be considered prior. If the stop date is unknown or incomplete and the medications cannot definitely be considered as stopped prior to Day 1 then the medications will be considered as concomitant medications at randomisation or change in concomitant medication, depending on the start date.

**Concomitant medications** at randomisation are defined as medications that started before Day 1 and either stopped on Day 1 or continued into the study. Partial start dates where the medication cannot definitely be considered as starting prior to Day 1 will lead to a categorisation of the medications as having started on or after dosing.

**Change in concomitant medication** is defined as medication that started on or after Day 1. If the medication start or stop dates are partial then the rules for prior and concomitant medication, detailed above will be observed prior to assigning a category.

The number (%) of patients reporting the use of any prior medications and the number (%) of patients taking each drug by ATC classification and PT will be summarised using the ITT Population. This table will be repeated for concomitant medications at randomisation and for change in concomitant medication.

### 11.5 Concomitant Procedures and Surgery

The number of concomitant procedures and the number of concomitant surgeries will be tabulated for the 30 day period before the first infusion and for the period from first infusion until the final Day 21 Visit.

### 11.6 Study Drug Exposure

Infusion volume (total and by infusion) will be summarised. Reason for volume other than 25 ml will be listed.

For each timepoint, infusion delay (yes, no) will be summarised. Reason for delay will be listed.

### 11.7 Efficacy Analyses

Treatment comparisons will be ALF-5755 vs, placebo. The main analysis set for the efficacy analyses will be the ITT Population.

The primary efficacy analysis is the treatment comparison of rate of change of PR from H0 to H72 using the Wilcoxon rank-sum test and the ITT Population. A p-value below 0.05 will be considered as significant. This analysis will be repeated for the PP Population.

#### 11.7.1 Primary Variable

Rate of change of PR (hours<sup>-1</sup>) during the 72 hours following treatment initiation will be summarised. The treatment groups will be compared using the Wilcoxon rank-sum (Mann-Whitney-Wilcoxon) test using the ITT Population.

In addition the group comparison will be adjusted for the following etiology factor using the Cochran-Mantel-Haenszel test (with modified ridit scores):

- Hepatitis etiology
  - Viral hepatitis A
  - Viral Hepatitis B or Autoimmune Hepatitis
  - Other: This will principally be Viral Hepatitis E or Other Etiology or Undetermined Etiology or Drug-induced Etiology

It is expected that these categories will be mutually exclusive. If any patient is classified as more than one factor level then the appropriate classification will be agreed at or before the data review



meeting before database lock and unblinding. All classifications will be reviewed and approved at that time.

Results for PR and changes from baseline will also be summarised. Median change from baseline will be presented in a line graph.

The summaries and analyses will be repeated using the PP Population.

#### 11.7.2 Secondary Variables

The following secondary variables will be analysed in the same way as the primary variable:

- Rate of change of FV
- Rate of change of INR
- Rate of change of MELD
- Rate of change of ALT
- Rate of change of AST

Change in HE grade from H0 to each subsequent timepoint will be summarised and the treatment groups will be compared using the the Cochran-Mantel-Haenszel test (with modified ridit scores), unadjusted and adjusted for the same etiology factor. HE grade will be summarized by visit.

The Glasgow Coma Scale (GCS) will be listed.

Overall survival will be analysed as follows:

- Overall survival at D21 will be tabulated and the treatment groups will be compared using the Chi-squared test.
- Survival time from start of treatment will be compared between the treatment groups using the log rank test with time censored at D21 (20 days from start of treatment). If survival status is unknown at D21, time will be censored at date last known alive. The number (%) of patients with a response and the number (%) censored will be presented. Kaplan-Meier estimates of the median and quartiles and corresponding 95% confidence intervals will be presented for each treatment group. A plot of the Kaplan-Meier survival function by treatment group will be presented.
- Survival time from start of treatment will be compared between the treatment groups adjusting for the etiology risk factor used for the primary analysis based on the Cox proportional hazards model, with time censored at D21 (20 days from start of treatment). If survival status is unknown at D21, time will be censored at date last known alive. The hazard ratio and associated 95% confidence interval will be presented.

Transplant-free survival will be analysed in the same way as overall survival.

Time to transplantation will be analysed in the same way as overall survival, with patients who die being censored at the time of death. The numbers of patients assessed as requiring liver transplantation by D21 will also be presented.

Hospital-free days (i.e. days alive following hospital discharge) up to D21 will be summarised and the treatment groups will be compared using the Wilcoxon rank-sum (Mann-Whitney-Wilcoxon) test. Note that it is not expected that any patients will be readmitted during this period.

### 11.8 Evaluation of Exploratory Endpoint(s)

Total and cleaved CK18 will be summarised at each assessment. Rate of change from H0 to H72 (i.e. change divided by 72) will also be presented. The treatment groups will be compared using the Wilcoxon rank-sum (Mann-Whitney-Wilcoxon) test.

During data review, it was noted that some samples labeled "pre-dose" were in fact taken after dosing in error. These will be excluded from the summaries and analyses, but will be included (and flagged) in the listings.

Other biomarker parameters will be presented in the same way.

### 11.9 Subgroup Analyses

The following subgroups are defined (see Section 10.5):

- Viral Hepatitis B or Autoimmune Hepatitis
- Viral Hepatitis E or Other Etiology or Undetermined Etiology or Drug-induced Etiology
- Viral hepatitis A
- Viral Hepatitis B
- Viral Hepatitis E
- Autoimmune hepatitis
- Other etiology (including Viral Hepatitis E) – relevant boxes on the CRF to be defined
- Other etiology (excluding Viral Hepatitis E) – relevant boxes on the CRF to be defined
- Undetermined etiology
- Drug-induced etiology
- Initial PR above or equal to the median
- Initial PR below the median
- Hepatic encephalopathy grade 0
- Hepatic encephalopathy grade I or II
- N-acetyl cysteine treatment
- No N-acetyl cysteine treatment

The primary efficacy analysis (ITT population) will be repeated for these subgroups. Only the first two will be presented as part of the main delivery; the others will be programmed and presented on request by Alfact. (See Section 14)

### 11.10 Post-hoc Exploratory Analyses

Additional exploratory analyses will be performed following review of the main results. These may include:

- repeating the primary and/or secondary analyses for different combinations of the subgroups
- repeating the primary and/or secondary analyses for biomarker subgroups e.g. based on CK18, IL6 GC globulin, HIP/PAP at admission.

### 11.11 PK Analyses

#### 11.11.1 Plasma Concentration Data

Pharmacokinetic samples will be collected at the following times for 16 patients:

- H0, H0+10mins, H1, H2, H6
- H12
- H48
- H60, H60+10mins, H61, H62, H66
- H72
- H84

Plasma concentrations of ALF-5755 will be summarised using descriptive statistics (N, AM, GM, SD, %CV, median, minimum, maximum) by scheduled time points.

Individual patient profile plots of plasma concentration vs. actual time points will be presented for ALF-5755 from H0 to H12 (Day 1) and from H60 to H72 (Day 5) on the same graph. The axis will be labelled with the planned sample time points but the concentration will be presented at the actual time point the sample was taken.

### 11.11.2 PK Parameters

The following PK parameters will be evaluated from the plasma concentrations for ALF-5755 (active group only) for the first and sixth infusion using actual sample times<sup>5</sup>:

**C<sub>max</sub> (ng/mL) – Maximum Plasma Concentration.** The maximum plasma concentration measured during the 12 hour post-dose period.

**T<sub>max</sub> (h) – Time to Maximum Plasma Concentration.** The time at which the highest plasma concentration was measured during the 12 hour post-dose period. T<sub>max</sub> will be used as an estimate of the onset of absorption. This will normally be at H0+10mins and at H60+10mins.

**k – Terminal Rate Constant.** The negative of the slope of the natural log (ln) concentration-time curve in the terminal elimination phase, where the points comprising the ln concentration-time curve form a straight line.

**t<sub>1/2</sub> (h) – Terminal Half-life.** ln(2)/k.

**AUC<sub>0-12</sub> (ng/mL) – Area Under the Plasma Concentration Time Curve.** The area-under-the-curve, from time zero to 12 hours post-dose, calculated by the log-linear trapezoidal rule (the linear method will be adopted for concentrations rising to the maximum concentration and the logarithmic method for all subsequent data points).

**AUC<sub>0-t</sub> (ng/mL) – Area Under the Plasma Concentration Time Curve.** The area-under-the-curve, from time zero to the last quantifiable concentration at time t, calculated by the log-linear trapezoidal rule (the linear method will be adopted for concentrations rising to the maximum concentration and the logarithmic method for all subsequent data points).

Each plasma PK parameter will be summarised using descriptive statistics (N, AM, GM, SD, %CV, median, minimum, maximum) by visit using the PK Population.

The achievement of steady-state will be assessed by comparison of ALF-5755 concentrations on H48, H60 and H72. No formal analysis will be performed.

The extent of accumulation will be assessed by comparison of AUC<sub>0-12</sub> at H0 and AUC<sub>0-12</sub> at H60. The accumulation ratio R = (AUC<sub>0-12</sub> at H60)/(AUC<sub>0-12</sub> at H0) will be calculated and summarised with the other PK parameters.

## 11.12 Safety Analyses

### 11.12.1 Adverse Events

All adverse events (AE) will be classified using the version of the MedDRA coding dictionary specified in the DHM.

Events will be classified as treatment-emergent if they started or increased in severity on or after the first date and time of medication dosing and up to study closure or withdrawal date. If an event start date is partial, then the start day, month, year or stop date will be used to determine if the event is treatment-emergent. If the classification of the AE cannot be determined from the data available, then the event will be considered treatment-emergent.

Treatment-emergent adverse events (TEAEs) will be further classified as follows:

**Severe TEAEs:** Severity classified as at least 'severe' or Common Toxicity Criteria [CTC] grade 3, 4 or 5) or missing.

**Serious TEAEs:** Serious classified as 'yes' or missing.

**Drug-related TEAEs:** Relationship to study drug classified as 'possible', 'probable' or 'definite' or missing.

---

<sup>5</sup> i.e. the times when the samples were taken, not the nominal times, 12 hours, 24 hours etc.

**Serious drug-related TEAEs:** Both serious and drug-related, as specified above.

**TEAEs leading to withdrawal from study:** Action taken classified as 'discontinued'.

TEAEs overall and in each of the above classifications will be summarised.

Summaries for each level of severity will also be presented.

Summaries by system organ class (SOC) and preferred term will also be presented for treatment-emergent events. Similar tables will be presented for each of the classifications of treatment-emergent events above.

All AE summary tables will show the number (%) of patients having at least one event and the number of events in each treatment group and overall. Note: If a patient has multiple AEs with the same preferred term, these will be summarised once within the count for N (%) of patients, but each event will be counted within the number of reports n of each AE.

The following will be presented in listing format within the data summaries:

- Deaths
- Serious Adverse Events
- Adverse Events which Led to Withdrawal

All adverse events (including non-treatment-emergent events) recorded on the CRF will be listed within the data listings.

#### *11.12.2 Laboratory Data*

Routine clinical laboratory tests will be carried out throughout the study.

Laboratory data listings will be presented in two ways:

- Abnormal values (presented within the data summaries)
- All laboratory data (presented within the data listings)

The absolute values of each parameter will be summarised at each visit.

Mean plots will be presented for a selection of laboratory parameters, to be agreed before DBL.

#### *11.12.3 Anti-ALF-5755 antibodies*

Plasma concentrations of anti-ALF-5755 antibodies will be collected before infusion at H0 on D1, D8 and D21. Results will be summarized at each visit.

#### *11.12.4 Clinical Examination*

A clinical examination will be conducted throughout the study and pre- and post-infusion as specified in the study schedule.

For each site (01=General Appearance, 02=Head, Eyes, Ears, Nose, Throat [HEENT] etc) shift tables will be presented showing changes from baseline to each assessment for normal / abnormal clinical examination results.

#### *11.12.5 Vital Signs*

Systolic blood pressure, diastolic blood pressure, heart rate and respiratory rate are collected throughout the study and pre- and post-dose. Body temperature is collected throughout the study.

The absolute values of the vital signs will be summarised at each assessment.

#### *11.12.6 Electrocardiogram*

A 12-lead ECG will be completed throughout the study and pre- and post-dose.

The number and percentage of the patients with Normal / Abnormal Not Clinically Significant (NCS) / Abnormal Clinically Significant (CS) ECG results will be summarised.

#### 11.12.7 Arterial Blood Gas with Lactates

Results for arterial blood gas (pH, PaO<sub>2</sub>, PaCo<sub>2</sub>, HCO<sub>3</sub>, bass excess and lactates) will be listed.

## 12 VALIDATION

All tables, figures and listings will be subject to independent quality control and visual review. Unique tables will be independently programmed. Findings will be documented in a quality control form and actions taken will also be documented.

The completed form will be reviewed and signed by both programmers and by the head of biostatistics.

## 13 LITERATURE CITATIONS/REFERENCES

None

## 14 LIST OF TABLES, FIGURES AND LISTINGS

Outputs to be programmed and delivered on request by Alfact are presented in italics and shaded.

### 14.1 List of Tables

#### Demographic Data

|                       |                                                     |                          |
|-----------------------|-----------------------------------------------------|--------------------------|
| Table 14.1.1          | Patient Disposition                                 | All Available Subjects   |
| Table 14.1.2          | Study Termination and Primary Reason for Withdrawal | All Randomised Patients  |
| Table 14.1.3.1        | Demographics and Baseline Characteristics           | ITT Population           |
| Table 14.1.3.2        | Baseline Factors                                    | ITT Population           |
| <i>Table 14.1.4.1</i> | <i>Medical History</i>                              | <i>ITT Population</i>    |
| <i>Table 14.1.4.2</i> | <i>Current Medical Conditions</i>                   | <i>ITT Population</i>    |
| <i>Table 14.1.5.1</i> | <i>Prior Medications</i>                            | <i>ITT Population</i>    |
| <i>Table 14.1.5.2</i> | <i>Concomitant Medications</i>                      | <i>ITT Population</i>    |
| <i>Table 14.1.5.3</i> | <i>Changes in Concomitant Medications</i>           | <i>ITT Population</i>    |
| <i>Table 14.1.5.4</i> | <i>Concomitant Procedures and Surgery</i>           | <i>ITT Population</i>    |
| <i>Table 14.1.6</i>   | <i>Study Drug Exposure</i>                          | <i>Safety Population</i> |

#### Efficacy Data

|                       |                                     |                       |
|-----------------------|-------------------------------------|-----------------------|
| Table 14.2.1.1        | Analysis of PR (0-72 hours)         | ITT Population        |
| Table 14.2.1.2        | Analysis of PR (0-72 hours)         | PP Population         |
| <i>Table 14.2.2.1</i> | <i>Analysis of FV (0-72 hours)</i>  | <i>ITT Population</i> |
| Table 14.2.2.2        | Analysis of INR (0-72 hours)        | ITT Population        |
| Table 14.2.2.3        | Analysis of MELD (0-72 hours)       | ITT Population        |
| <i>Table 14.2.2.4</i> | <i>Analysis of ALT (0-72 hours)</i> | <i>ITT Population</i> |
| <i>Table 14.2.2.5</i> | <i>Analysis of AST (0-72 hours)</i> | <i>ITT Population</i> |
| <i>Table 14.2.3.1</i> | <i>Change in HE Grade</i>           | <i>ITT Population</i> |
| <i>Table 14.2.3.2</i> | <i>HE Grade</i>                     | <i>ITT Population</i> |
| <i>Table 14.2.4.1</i> | <i>Overall Survival</i>             | <i>ITT Population</i> |
| Table 14.2.4.2        | Transplant-free Survival            | ITT Population        |
| Table 14.2.4.3        | Time to Transplantation             | ITT Population        |
| Table 14.2.5          | Hospital-free Days                  | ITT Population        |
| Table 14.2.6.1        | Total CK18                          | ITT Population        |
| Table 14.2.6.2        | Cleaved CK18                        | ITT Population        |
| <i>Table 14.2.6.3</i> | <i>Biomarkers</i>                   | <i>ITT Population</i> |

#### Subgroup Analyses

|                   |                             |                                                                                                       |
|-------------------|-----------------------------|-------------------------------------------------------------------------------------------------------|
| Table 14.2.1.1.1  | Analysis of PR (0-72 hours) | ITT Population with Viral Hepatitis B or Autoimmune Hepatitis                                         |
| Table 14.2.1.1.2  | Analysis of PR (0-72 hours) | ITT Population with Viral Hepatitis E, Other Etiology, Undetermined Etiology or Drug-induced Etiology |
| Table 14.2.1.1.3  | Analysis of PR (0-72 hours) | ITT Population with Viral Hepatitis A                                                                 |
| Table 14.2.1.1.4  | Analysis of PR (0-72 hours) | ITT Population with Viral Hepatitis B                                                                 |
| Table 14.2.1.1.5  | Analysis of PR (0-72 hours) | ITT Population with Viral Hepatitis E                                                                 |
| Table 14.2.1.1.6  | Analysis of PR (0-72 hours) | ITT Population with Autoimmune Hepatitis                                                              |
| Table 14.2.1.1.7  | Analysis of PR (0-72 hours) | ITT Population with Other Etiology (including Viral Hepatitis E)                                      |
| Table 14.2.1.1.8  | Analysis of PR (0-72 hours) | ITT Population with Other Etiology (excluding Viral Hepatitis E)                                      |
| Table 14.2.1.1.9  | Analysis of PR (0-72 hours) | ITT Population with Undetermined Etiology                                                             |
| Table 14.2.1.1.10 | Analysis of PR (0-72 hours) | ITT Population with Drug-induced Etiology                                                             |
| Table 14.2.1.1.11 | Analysis of PR (0-72 hours) | ITT Population with Initial PR $\geq$ the median                                                      |
| Table 14.2.1.1.12 | Analysis of PR (0-72 hours) | ITT Population with Initial PR < the median                                                           |
| Table 14.2.1.1.13 | Analysis of PR (0-72 hours) | ITT Population with HE Grade 0                                                                        |
| Table 14.2.1.1.14 | Analysis of PR (0-72 hours) | ITT Population with HE Grade I or II                                                                  |
| Table 14.2.1.1.15 | Analysis of PR (0-72 hours) | ITT Population with NAC                                                                               |
| Table 14.2.1.1.16 | Analysis of PR (0-72 hours) | ITT Population without NAC                                                                            |

**PK Data**

|                |                                  |               |
|----------------|----------------------------------|---------------|
| Table 14.2.7.1 | Plasma Concentration of ALF-5755 | PK Population |
| Table 14.2.7.2 | PK Parameters for ALF-5755       | PK Population |

**Safety Data**

|                |                                                                                                               |                   |
|----------------|---------------------------------------------------------------------------------------------------------------|-------------------|
| Table 14.3.1.1 | Treatment-Emergent Adverse Events                                                                             | Safety Population |
| Table 14.3.1.2 | Treatment-Emergent Adverse Events, by SOC and PT                                                              | Safety Population |
| Table 14.3.1.3 | Severe Treatment-Emergent Adverse Events, by SOC and PT                                                       | Safety Population |
| Table 14.3.1.4 | Serious Treatment-Emergent Adverse Events, by SOC and PT                                                      | Safety Population |
| Table 14.3.1.5 | Drug-Related Treatment-Emergent Adverse Events, by SOC and PT                                                 | Safety Population |
| Table 14.3.1.6 | Serious Drug-Related Treatment-Emergent Adverse Events, by SOC and PT                                         | Safety Population |
| Table 14.3.1.7 | Treatment-Emergent Adverse Events Leading to Withdrawal from the Study, by SOC and PT                         | Safety Population |
| Table 14.3.2.1 | Listing of Deaths                                                                                             |                   |
| Table 14.3.2.2 | Listing of Serious Adverse Events                                                                             |                   |
| Table 14.3.2.3 | Listing of Withdrawals Due to Adverse Events                                                                  |                   |
| 14.3.3         | Narratives of deaths, other serious and certain other significant adverse events (to be presented in the CSR) |                   |
| Table 14.3.4   | Listing of Abnormal Laboratory Values                                                                         |                   |
| Table 14.3.5.1 | Haematology                                                                                                   | Safety Population |
| Table 14.3.5.2 | Biochemistry                                                                                                  | Safety Population |
| Table 14.3.5.3 | Urinalysis                                                                                                    | Safety Population |
| Table 14.3.5.4 | Plasma Concentration of anti-ALF-5755 Antibodies                                                              | Safety Population |
| Table 14.3.6   | Clinical Examination                                                                                          | Safety Population |
| Table 14.3.7   | Vital Signs                                                                                                   | Safety Population |
| Table 14.3.8   | 12-lead Electrocardiogram                                                                                     | Safety Population |

## 14.2 List of Figures

|            |                                                       |                |
|------------|-------------------------------------------------------|----------------|
| Figure 1.1 | PR: Median Change from Baseline                       | ITT Population |
| Figure 1.2 | FV: Median Change from Baseline                       | ITT Population |
| Figure 1.3 | INR: Median Change from Baseline                      | ITT Population |
| Figure 1.4 | MELD: Median Change from Baseline                     | ITT Population |
| Figure 1.5 | ALT: Median Change from Baseline                      | ITT Population |
| Figure 1.6 | AST: Median Change from Baseline                      | ITT Population |
| Figure 2.1 | Kaplan-Meier Plot of Survival                         | ITT Population |
| Figure 2.2 | Kaplan-Meier Plot of Transplant-Free Survival         | ITT Population |
| Figure 2.3 | Kaplan-Meier Plot of Time to Transplantation          | ITT Population |
| Figure 3   | Individual Patient PK Plots of ALF-5755 Concentration | PK Population  |



Figure 4

Mean Plots of Laboratory Parameters

Safety Population

### 14.3 List of Listings

#### Patient Data Listings

|                  |                                      |
|------------------|--------------------------------------|
| Listing 16.2.1   | Discontinued Patients                |
| Listing 16.2.2   | Protocol Deviations                  |
| Listing 16.2.3   | Patients in the Analysis Populations |
| Listing 16.2.4.1 | Demographic Data                     |
| Listing 16.2.4.2 | Baseline Data                        |
| Listing 16.2.4.3 | Hepatitis Etiology                   |
| Listing 16.2.4.4 | Baseline Serology Data               |
| Listing 16.2.5   | Study Drug Exposure                  |
| Listing 16.2.6   | Efficacy Response Data               |
| Listing 16.2.7   | Adverse Events                       |
| Listing 16.2.8.1 | Haematology                          |
| Listing 16.2.8.2 | Biochemistry                         |
| Listing 16.2.8.3 | Urinalysis                           |
| Listing 16.2.8.4 | CK18                                 |
| Listing 16.2.8.5 | Anti-ALF-5755 Antibodies             |

#### Individual Patient Data Listings (Archive)

|                  |                                                   |
|------------------|---------------------------------------------------|
| Listing 16.4.1   | Final Status                                      |
| Listing 16.4.2   | Visit Dates                                       |
| Listing 16.4.3.1 | Inclusion Criteria                                |
| Listing 16.4.3.2 | Exclusion Criteria                                |
| Listing 16.4.3.3 | Eligibility Confirmation and Randomisation Status |
| Listing 16.4.4   | Medical History                                   |
| Listing 16.4.5.1 | Concomitant Medications                           |
| Listing 16.4.5.2 | Concomitant Procedures                            |
| Listing 16.4.5.3 | Concomitant Surgery                               |
| Listing 16.4.6.1 | Hemostasis                                        |
| Listing 16.4.6.2 | Transplantation and Hospitalisation               |
| Listing 16.4.6.3 | Hepatic Encephalopathy and Glasgow Coma Scale     |
| Listing 16.4.6.4 | Survival Status                                   |
| Listing 16.4.7.1 | PK Data                                           |
| Listing 16.4.7.2 | PK Parameters                                     |
| Listing 16.4.8   | CK18 Sampling                                     |

|                 |                                  |
|-----------------|----------------------------------|
| Listing 16.4.9  | Clinical Examination             |
| Listing 16.4.10 | Vital Signs                      |
| Listing 16.4.11 | 12-Lead Electrocardiogram        |
| Listing 16.4.12 | Arterial Blood Gas with Lactates |
| Listing 16.4.13 | Other Sampling Collection Data   |
| Listing 16.4.14 | BP and HR Monitoring             |

## 15 SHELLS FOR TABLES, FIGURES AND LISTINGS

The intended layouts for tables, figures and listings are presented. However, it may be necessary to change the layouts, as appropriate, upon review of the data available.

Output will be produced as rich text Word documents (.rtf files).

Subject to this, the following will apply:

- Layout will be landscape, fixed width font in font size 8.
- Each output will have the heading:  
ALF-5755\_P2\_ALF (left); date ddMMMyyyy (right)
- Table headings will define the analysis set used for the summary/analysis.
- Footnotes will be included where appropriate.  
All outputs will have a footnote specifying the SAS program path and filename and the rtf path and filename (left); page x/y (right)
- Patient number and treatment group will be included in all listings.

ALF-5755\_P2\_ALF

ddMMMyyyy

Table 14.1.1 Patient Disposition (All Available Subjects)

|                   | ALF-5755<br>(N=xx) | Placebo<br>(N=xx) | Total<br>(N=xx) |
|-------------------|--------------------|-------------------|-----------------|
| Screening         |                    |                   | xx              |
| Safety Population | xx                 | xx                | xx              |
| ITT Population    | xx (xx.x%)         | xx (xx.x%)        | xx              |
| PP Population     | xx (xx.x%)         | xx (xx.x%)        | xx              |
| Completed         | xx (xx.x%)         | xx (xx.x%)        | xx              |

Source: Listing 16.x.x

Path\Filename

Page x/y

ALF-5755\_P2\_ALF

ddMMMyyyy

Table 14.1.2 Study Termination and Primary Reason for Withdrawal (All Randomised Patients)

|                                  | ALF-5755<br>(N=xx) | Placebo<br>(N=xx) | Total<br>(N=xx) |
|----------------------------------|--------------------|-------------------|-----------------|
| Completed                        | xx (xx.x%)         | xx (xx.x%)        | xx (xx.x%)      |
| Early withdrawal                 | xx (xx.x%)         | xx (xx.x%)        | xx (xx.x%)      |
| Main reason for early withdrawal |                    |                   |                 |
| Adverse event                    | xx (xx.x%)         | xx (xx.x%)        | xx (xx.x%)      |
| Etc                              | xx (xx.x%)         | xx (xx.x%)        | xx (xx.x%)      |

Source: Listing 16.x.x

Path\Filename

Page x/y

ALF-5755\_P2\_ALF

ddMMMyyyy

Table 14.1.3.1 Demographics and Baseline Characteristics (ITT Population)

|                           |           | ALF-5755<br>(N=xx) | Placebo<br>(N=xx) | Total<br>(N=xx) |
|---------------------------|-----------|--------------------|-------------------|-----------------|
| Age (years)               | N         | xx                 | xx                | xx              |
|                           | Mean      | xx.xx              | xx.xx             | xx.xx           |
|                           | SD        | xx.xx              | xx.xx             | xx.xx           |
|                           | Median    | xx.xx              | xx.xx             | xx.xx           |
|                           | Maximum   | xx.x               | xx.x              | xx.x            |
|                           | Minimum   | xx.x               | xx.x              | xx.x            |
|                           | Gender    | Male               | xx (xx.x%)        | xx (xx.x%)      |
| Female                    |           | xx (xx.x%)         | xx (xx.x%)        | xx (xx.x%)      |
| Race                      | Caucasian | xx (xx.x%)         | xx (xx.x%)        | xx (xx.x%)      |
|                           | Etc       |                    |                   |                 |
| Height (cm)               | N         |                    |                   |                 |
|                           | Etc       |                    |                   |                 |
| Weight (kg)               | N         |                    |                   |                 |
|                           | Etc       |                    |                   |                 |
| BMI (kg/cm <sup>2</sup> ) | N         |                    |                   |                 |
|                           | Etc       |                    |                   |                 |

Source: Listing 16.x.x

Path\Filename

Page x/y

ALF-5755\_P2\_ALF

ddMMMyyyy

Table 14.1.3.2 Baseline Factors (ITT Population)

|                             |                        | ALF-5755<br>(N=xx) | Placebo<br>(N=xx) | Total<br>(N=xx) |
|-----------------------------|------------------------|--------------------|-------------------|-----------------|
| Hepatitis etiology          | Hepatitis A            | xx (xx.x%)         | xx (xx.x%)        | xx (xx.x%)      |
|                             | Hepatitis B            | xx (xx.x%)         | xx (xx.x%)        | xx (xx.x%)      |
|                             | Hepatitis E            | xx (xx.x%)         | xx (xx.x%)        | xx (xx.x%)      |
|                             | Autoimmune hepatitis   | xx (xx.x%)         | xx (xx.x%)        | xx (xx.x%)      |
|                             | Other etiology         | xx (xx.x%)         | xx (xx.x%)        | xx (xx.x%)      |
|                             | Undetermined etiology  | xx (xx.x%)         | xx (xx.x%)        | xx (xx.x%)      |
|                             | Drug-induced hepatitis | xx (xx.x%)         | xx (xx.x%)        | xx (xx.x%)      |
|                             | None of the above      | xx (xx.x%)         | xx (xx.x%)        | xx (xx.x%)      |
| Hepatic encephalopathy      | Grade 0                | xx (xx.x%)         | xx (xx.x%)        | xx (xx.x%)      |
|                             | Grade I                | xx (xx.x%)         | xx (xx.x%)        | xx (xx.x%)      |
|                             | Grade II               | xx (xx.x%)         | xx (xx.x%)        | xx (xx.x%)      |
| N-acetyl cysteine treatment | Yes                    | xx (xx.x%)         | xx (xx.x%)        | xx (xx.x%)      |
|                             | No                     | xx (xx.x%)         | xx (xx.x%)        | xx (xx.x%)      |

Source: Listing 16.x.x

Path\Filename

Page x/y

ALF-5755\_P2\_ALF

ddMMMyyyy

Table 14.1.4.1 Medical History (ITT Population)

|                                                        | ALF-5755<br>(N=xx) | Placebo<br>(N=xx) | Total<br>(N=xx) |
|--------------------------------------------------------|--------------------|-------------------|-----------------|
| Patients with any history                              | xx (xx.x%)         | xx (xx.x%)        | xx (xx.x%)      |
| Patients with any history related to liver disease     | xx (xx.x%)         | xx (xx.x%)        | xx (xx.x%)      |
| General appearance                                     | xx (xx.x%)         | xx (xx.x%)        | xx (xx.x%)      |
| Head, Eyes, Ears, Nose, Throat                         | xx (xx.x%)         | xx (xx.x%)        | xx (xx.x%)      |
| Etc                                                    |                    |                   |                 |
| Patients with any history not related to liver disease | xx (xx.x%)         | xx (xx.x%)        | xx (xx.x%)      |
| General appearance                                     | xx (xx.x%)         | xx (xx.x%)        | xx (xx.x%)      |
| Head, Eyes, Ears, Nose, Throat                         | xx (xx.x%)         | xx (xx.x%)        | xx (xx.x%)      |
| Etc                                                    |                    |                   |                 |

Source: Listing 16.x.x

Path\Filename

Page x/y

*This layout also applies to:  
 Table 14.1.4.2*

ALF-5755\_P2\_ALF

ddMMMyyyy

Table 14.1.5.1 Prior Medications (ITT Population)

|                      | ALF-5755<br>(N=xx) | Placebo<br>(N=xx) | Total<br>(N=xx) |
|----------------------|--------------------|-------------------|-----------------|
| Any Prior Medication | xx (xx.x%)         | xx (xx.x%)        | xx (xx.x%)      |
| ATC classification   | xx (xx.x%)         | xx (xx.x%)        | xx (xx.x%)      |
| Preferred Term       | xx (xx.x%)         | xx (xx.x%)        | xx (xx.x%)      |
| Preferred Term       | xx (xx.x%)         | xx (xx.x%)        | xx (xx.x%)      |
| Etc                  | xx (xx.x%)         | xx (xx.x%)        | xx (xx.x%)      |
| ATC classification   | xx (xx.x%)         | xx (xx.x%)        | xx (xx.x%)      |
| Preferred Term       | xx (xx.x%)         | xx (xx.x%)        | xx (xx.x%)      |
| Preferred Term       | xx (xx.x%)         | xx (xx.x%)        | xx (xx.x%)      |
| Etc                  | xx (xx.x%)         | xx (xx.x%)        | xx (xx.x%)      |
| Etc                  |                    |                   |                 |

Source: Listing 16.x.x

Path\Filename

Page x/y

*This layout also applies to:*  
 Table 14.1.5.2  
 Table 14.1.5.3



ALF-5755\_P2\_ALF

ddMMMyyyy

Table 14.1.5.4 Concomitant Procedures and Surgery (ITT Population)

|                                               |     | ALF-5755<br>(N=xx) | Placebo<br>(N=xx) | Total<br>(N=xx) |
|-----------------------------------------------|-----|--------------------|-------------------|-----------------|
| <b>Concomitant Procedures</b>                 |     |                    |                   |                 |
| 30 day period before 1 <sup>st</sup> infusion | 0   | xx (xx.x%)         | xx (xx.x%)        | xx (xx.x%)      |
|                                               | 1   | xx (xx.x%)         | xx (xx.x%)        | xx (xx.x%)      |
|                                               | Etc | xx (xx.x%)         | xx (xx.x%)        | xx (xx.x%)      |
| 1 <sup>st</sup> infusion to D21               | 0   | xx (xx.x%)         | xx (xx.x%)        | xx (xx.x%)      |
|                                               | 1   | xx (xx.x%)         | xx (xx.x%)        | xx (xx.x%)      |
|                                               | Etc | xx (xx.x%)         | xx (xx.x%)        | xx (xx.x%)      |
| <b>Concomitant Surgery</b>                    |     |                    |                   |                 |
| 30 day period before 1 <sup>st</sup> infusion | 0   | xx (xx.x%)         | xx (xx.x%)        | xx (xx.x%)      |
|                                               | 1   | xx (xx.x%)         | xx (xx.x%)        | xx (xx.x%)      |
|                                               | Etc | xx (xx.x%)         | xx (xx.x%)        | xx (xx.x%)      |
| 1 <sup>st</sup> infusion to D21               | 0   | xx (xx.x%)         | xx (xx.x%)        | xx (xx.x%)      |
|                                               | 1   | xx (xx.x%)         | xx (xx.x%)        | xx (xx.x%)      |
|                                               | Etc | xx (xx.x%)         | xx (xx.x%)        | xx (xx.x%)      |

Source: Listing 16.x.x

Path\Filename

Page x/y

ALF-5755\_P2\_ALF

ddMMMyyyy

Table 14.1.6 Study Drug Exposure (Safety Population)

|                 |         | ALF-5755<br>(N=xx) | Placebo<br>(N=xx) | Total<br>(N=xx) |
|-----------------|---------|--------------------|-------------------|-----------------|
| Infusion volume |         |                    |                   |                 |
| Total           | N       | xx                 | xx                | xx              |
|                 | Mean    | xx.xx              | xx.xx             | xx.xx           |
|                 | SD      | xx.xx              | xx.xx             | xx.xx           |
|                 | Median  | xx.xx              | xx.xx             | xx.xx           |
|                 | Maximum | xx.x               | xx.x              | xx.x            |
|                 | Minimum | xx.x               | xx.x              | xx.x            |
| H0              | N       |                    |                   |                 |
|                 | Etc     |                    |                   |                 |
| H12             | N       |                    |                   |                 |
|                 | Etc     |                    |                   |                 |
| Etc             |         |                    |                   |                 |
| Infusion delay  |         |                    |                   |                 |
| H0              | Yes     | xx (xx.x%)         | xx (xx.x%)        | xx (xx.x%)      |
|                 | No      | xx (xx.x%)         | xx (xx.x%)        | xx (xx.x%)      |
| H12             | Yes     | xx (xx.x%)         | xx (xx.x%)        | xx (xx.x%)      |
|                 | No      | xx (xx.x%)         | xx (xx.x%)        | xx (xx.x%)      |
| Etc             |         |                    |                   |                 |

Source: Listing 16.x.x

Path\Filename

Page x/y

ALF-5755\_P2\_ALF

ddMMMyyyy

Table 14.2.1.1 Analysis of PR (0-72 hours) (ITT Population)

|                                                        |         | ALF-5755<br>(N=xx) | Placebo<br>(N=xx) | p-value |
|--------------------------------------------------------|---------|--------------------|-------------------|---------|
| Rate of change of PR                                   | N       | xx                 | xx                |         |
|                                                        | Mean    | xx.xx              | xx.xx             |         |
|                                                        | SD      | xx.xx              | xx.xx             |         |
|                                                        | Median  | xx.xx              | xx.xx             |         |
|                                                        | Maximum | xx.x               | xx.x              |         |
|                                                        | Minimum | xx.x               | xx.x              |         |
| Wilcoxon test                                          |         |                    |                   | x.xxx   |
| CMH test adjusting for hepatitis etiology <sup>1</sup> |         |                    |                   | x.xxx   |
| PR                                                     |         |                    |                   |         |
| Baseline                                               | N       | xx                 | xx                |         |
|                                                        | Mean    | xx.xx              | xx.xx             |         |
|                                                        | SD      | xx.xx              | xx.xx             |         |
|                                                        | Median  | xx.xx              | xx.xx             |         |
|                                                        | Maximum | xx.x               | xx.x              |         |
|                                                        | Minimum | xx.x               | xx.x              |         |
| H0                                                     | N       |                    |                   |         |
|                                                        | Etc     |                    |                   |         |
|                                                        | H12     |                    |                   |         |
|                                                        | Etc     |                    |                   |         |
| Change from H0 to H12                                  |         |                    |                   |         |
| H24                                                    |         |                    |                   |         |
| Change from H0 to H24                                  |         |                    |                   |         |
| Etc                                                    |         |                    |                   |         |

<sup>1</sup> Hepatitis etiology factor levels: Viral Hepatitis A; Viral Hepatitis B or Autoimmune Hepatitis; Other

Source: Listing 16.x.x

Path\Filename

Page x/y

Version date: 16 April 2013

*This layout also applies to:*

*Table 14.2.1.2*

*Table 14.2.2.1*

*Table 14.2.2.2*

*Table 14.2.2.3*

*Table 14.2.2.4*

*Table 14.2.2.5*

ALF-5755\_P2\_ALF

ddMMMyyyy

Table 14.2.1.1.1 Analysis of PR (0-72 hours) (ITT Population with Viral Hepatitis B or Autoimmune Hepatitis)

|                       |         | ALF-5755<br>(N=xx) | Placebo<br>(N=xx) | p-value |
|-----------------------|---------|--------------------|-------------------|---------|
| Rate of change of PR  | N       | xx                 | xx                |         |
|                       | Mean    | xx.xx              | xx.xx             |         |
|                       | SD      | xx.xx              | xx.xx             |         |
|                       | Median  | xx.xx              | xx.xx             |         |
|                       | Maximum | xx.x               | xx.x              |         |
|                       | Minimum | xx.x               | xx.x              |         |
| Wilcoxon test         |         |                    |                   | x.xxx   |
| PR                    |         |                    |                   |         |
| Baseline              | N       | xx                 | xx                |         |
|                       | Mean    | xx.xx              | xx.xx             |         |
|                       | SD      | xx.xx              | xx.xx             |         |
|                       | Median  | xx.xx              | xx.xx             |         |
|                       | Maximum | xx.x               | xx.x              |         |
|                       | Minimum | xx.x               | xx.x              |         |
| H0                    | N       |                    |                   |         |
|                       | Etc     |                    |                   |         |
| H12                   | Etc     |                    |                   |         |
| Change from H0 to H12 |         |                    |                   |         |
| H24                   |         |                    |                   |         |
| Change from H0 to H24 |         |                    |                   |         |
| Etc                   |         |                    |                   |         |

Source: Listing 16.x.x

*This layout also applies to:  
Table 14.2.1.1.2 to 14.2.1.1.16*

ALF-5755\_P2\_ALF

ddMMMyyyy

Table 14.2.3.1 Change in HE grade (ITT Population)

|                                                        |                   | ALF-5755<br>(N=xx) | Placebo<br>(N=xx) | p-value |
|--------------------------------------------------------|-------------------|--------------------|-------------------|---------|
| Change 0-12 hours                                      | Increase 4 grades | xx (xx.x%)         | xx (xx.x%)        |         |
|                                                        | Increase 3 grades | xx (xx.x%)         | xx (xx.x%)        |         |
|                                                        | Increase 2 grades | xx (xx.x%)         | xx (xx.x%)        |         |
|                                                        | Increase 1 grades | xx (xx.x%)         | xx (xx.x%)        |         |
|                                                        | No change         | xx (xx.x%)         | xx (xx.x%)        |         |
|                                                        | Decrease 1 grades | xx (xx.x%)         | xx (xx.x%)        |         |
|                                                        | Etc               |                    |                   |         |
| CMH test                                               |                   |                    | x.xxx             |         |
| CMH test adjusting for hepatitis etiology <sup>1</sup> |                   |                    | x.xxx             |         |
| Change 0-24 hours                                      | Increase 4 grades | xx (xx.x%)         | xx (xx.x%)        |         |
|                                                        | Increase 3 grades | xx (xx.x%)         | xx (xx.x%)        |         |
|                                                        | Increase 2 grades | xx (xx.x%)         | xx (xx.x%)        |         |
|                                                        | Increase 1 grades | xx (xx.x%)         | xx (xx.x%)        |         |
|                                                        | No change         | xx (xx.x%)         | xx (xx.x%)        |         |
|                                                        | Decrease 1 grades | xx (xx.x%)         | xx (xx.x%)        |         |
|                                                        | Etc               |                    |                   |         |
| CMH test                                               |                   |                    | x.xxx             |         |
| CMH test adjusting for hepatitis etiology <sup>1</sup> |                   |                    | x.xxx             |         |
| Change 0-36 hours                                      | Increase 4 grades | xx (xx.x%)         | xx (xx.x%)        |         |
|                                                        | Etc               |                    |                   |         |
| Etc                                                    |                   |                    |                   |         |

<sup>1</sup> Hepatitis etiology factor levels: Viral Hepatitis A; Viral Hepatitis B or Autoimmune Hepatitis; Other

Source: Listing 16.x.x

Version date: 16 April 2013

Path\Filename

Page x/y

ALF-5755\_P2\_ALF

ddMMMyyyy

Table 14.2.3.2 HE grade (ITT Population)

|          |           | ALF-5755<br>(N=xx) | Placebo<br>(N=xx) | p-value |
|----------|-----------|--------------------|-------------------|---------|
| Baseline | Grade 0   | xx (xx.x%)         | xx (xx.x%)        |         |
|          | Grade I   | xx (xx.x%)         | xx (xx.x%)        |         |
|          | Grade II  | xx (xx.x%)         | xx (xx.x%)        |         |
|          | Grade III | xx (xx.x%)         | xx (xx.x%)        |         |
|          | Grade IV  | xx (xx.x%)         | xx (xx.x%)        |         |
| H0       | Grade 0   | xx (xx.x%)         | xx (xx.x%)        |         |
|          | Etc       |                    |                   |         |
| H12      | Grade 0   | xx (xx.x%)         | xx (xx.x%)        |         |
|          | Etc       |                    |                   |         |

Source: Listing 16.x.x

Path\Filename

Page x/y

ALF-5755\_P2\_ALF

ddMMMyyyy

Table 14.2.4.1 Overall Survival (ITT Population)

|                                                                       |                  | ALF-5755<br>(N=xx) | Placebo<br>(N=xx) | p-value      |
|-----------------------------------------------------------------------|------------------|--------------------|-------------------|--------------|
| Survived to D21                                                       | Yes              | xx (xx.x%)         | xx (xx.x%)        |              |
|                                                                       | No               | xx (xx.x%)         | xx (xx.x%)        |              |
|                                                                       | Chi-squared test |                    |                   | x.xxxx       |
| Kaplan-Meier estimate (days)                                          | Upper quartile   | xx.x               | xx.x              |              |
|                                                                       | 95% CI           | xx.x, xx.x         | xx.x, xx.x        |              |
|                                                                       | Median           | xx.x               | xx.x              |              |
|                                                                       | 95% CI           | xx.x, xx.x         | xx.x, xx.x        |              |
|                                                                       | Lower quartile   | xx.x               | xx.x              |              |
|                                                                       | 95% CI           | xx.x, xx.x         | xx.x, xx.x        |              |
|                                                                       | Log Rank Test    |                    |                   | x.xxxx       |
| Cox regression analysis adjusting for hepatitis etiology <sup>1</sup> | Hazard ratio     |                    |                   | xx.xx        |
|                                                                       | 95% CI           |                    |                   | xx.xx, xx.xx |
|                                                                       | p-value          |                    |                   | x.xxxx       |
| Number (%) of responses                                               | xx (xx.x%)       | xx (xx.x%)         |                   |              |
| Number (%) censored                                                   | xx (xx.x%)       | xx (xx.x%)         |                   |              |
| Missing                                                               | xx               | xx                 |                   |              |

<sup>1</sup> Hepatitis etiology factor levels: Viral Hepatitis A; Viral Hepatitis B or Autoimmune Hepatitis; Other

Source: Listing 16.x.x

Path\Filename  
This layout also applies to:  
Table 14.2.4.2

Page x/y



ALF-5755\_P2\_ALF

ddMMMyyyy

Table 14.2.4.3 Time to Transplantation (ITT Population)

|                                                                       |                         | ALF-5755<br>(N=xx) | Placebo<br>(N=xx) | p-value                         |
|-----------------------------------------------------------------------|-------------------------|--------------------|-------------------|---------------------------------|
| Survived to D21 with no transplant required                           | Yes                     | xx (xx.x%)         | xx (xx.x%)        | x.xxxx                          |
|                                                                       | No                      | xx (xx.x%)         | xx (xx.x%)        |                                 |
|                                                                       | Chi-squared test        |                    |                   |                                 |
| Survived to D21 with no transplant performed                          | Yes                     | xx (xx.x%)         | xx (xx.x%)        | x.xxxx                          |
|                                                                       | No                      | xx (xx.x%)         | xx (xx.x%)        |                                 |
|                                                                       | Chi-squared test        |                    |                   |                                 |
| Kaplan-Meier estimate (days)                                          | Upper quartile          | xx.x               | xx.x              | x.xxxx                          |
|                                                                       | 95% CI                  | xx.x, xx.x         | xx.x, xx.x        |                                 |
|                                                                       | Median                  | xx.x               | xx.x              |                                 |
|                                                                       | 95% CI                  | xx.x, xx.x         | xx.x, xx.x        |                                 |
|                                                                       | Lower quartile          | xx.x               | xx.x              |                                 |
|                                                                       | 95% CI                  | xx.x, xx.x         | xx.x, xx.x        |                                 |
|                                                                       | Log Rank Test           |                    |                   |                                 |
| Cox regression analysis adjusting for hepatitis etiology <sup>1</sup> | Number (%) of responses | xx (xx.x%)         | xx (xx.x%)        | xx.xx<br>xx.xx, xx.xx<br>x.xxxx |
|                                                                       | Number (%) censored     | xx (xx.x%)         | xx (xx.x%)        |                                 |
|                                                                       | Missing                 | xx                 | xx                |                                 |
|                                                                       | Hazard ratio            |                    |                   |                                 |
|                                                                       | 95% CI                  |                    |                   |                                 |
|                                                                       | p-value                 |                    |                   |                                 |

<sup>1</sup> Hepatitis etiology factor levels: Viral Hepatitis A; Viral Hepatitis B or Autoimmune Hepatitis; Other

Source: Listing 16.x.x

Version date: 16 April 2013

Path\Filename

Page x/y

ALF-5755\_P2\_ALF

ddMMMyyyy

Table 14.2.5 Hospital-free Days (ITT Population)

|                                              |               | ALF-5755<br>(N=xx) | Placebo<br>(N=xx) | p-value |
|----------------------------------------------|---------------|--------------------|-------------------|---------|
| Hospital-free days up to<br>D21 <sup>1</sup> | N             | xx                 | xx                |         |
|                                              | Mean          | xx.xx              | xx.xx             |         |
|                                              | SD            | xx.xx              | xx.xx             |         |
|                                              | Median        | xx.xx              | xx.xx             |         |
|                                              | Maximum       | xx.x               | xx.x              |         |
|                                              | Minimum       | xx.x               | xx.x              |         |
|                                              | Wilcoxon test |                    |                   | x.xxx   |

<sup>1</sup> Days alive following hospital discharge

Source: Listing 16.x.x

Path\Filename

Page x/y

ALF-5755\_P2\_ALF

ddMMMyyyy

Table 14.2.6.1 Total CK18 (ITT Population)

|                       |               | ALF-5755<br>(N=xx) | Placebo<br>(N=xx) | p-value |
|-----------------------|---------------|--------------------|-------------------|---------|
| Change from H0 to H72 | N             | xx                 | xx                |         |
|                       | Mean          | xx.xx              | xx.xx             |         |
|                       | SD            | xx.xx              | xx.xx             |         |
|                       | Median        | xx.xx              | xx.xx             |         |
|                       | Maximum       | xx.x               | xx.x              |         |
|                       | Minimum       | xx.x               | xx.x              |         |
|                       | Wilcoxon test |                    |                   | x.xxx   |
| H0                    | N             | xx                 | xx                |         |
|                       | Mean          | xx.xx              | xx.xx             |         |
|                       | SD            | xx.xx              | xx.xx             |         |
|                       | Median        | xx.xx              | xx.xx             |         |
|                       | Maximum       | xx.x               | xx.x              |         |
|                       | Minimum       | xx.x               | xx.x              |         |
| H12                   | N             |                    |                   |         |
|                       | Etc           |                    |                   |         |
| Etc                   |               |                    |                   |         |

Source: Listing 16.x.x

Path\Filename

Page x/y

*This layout also applies to:*

*Table 14.2.6.2*

*Table 14.2.6.3*

ALF-5755\_P2\_ALF

ddMMMyyyy

Table 14.2.7.1 Plasma Concentration of ALF-5755 (PK Population)

|                              |         | ALF-5755<br>(N=xx) |
|------------------------------|---------|--------------------|
| H0 (pre-infusion)            | N       | xx                 |
|                              | AM      | xx.xx              |
|                              | GM      | xx.xx              |
|                              | SD      | xx.xx              |
|                              | %CV     | xx.x               |
|                              | Median  | xx.xx              |
|                              | Maximum | xx.x               |
|                              | Minimum | xx.x               |
| H0+10 mins (end of infusion) | N       | xx                 |
|                              | AM      | xx.xx              |
|                              | GM      | xx.xx              |
|                              | SD      | xx.xx              |
|                              | %CV     | xx.x               |
|                              | Median  | xx.xx              |
|                              | Maximum | xx.x               |
|                              | Minimum | xx.x               |
| Etc                          |         |                    |

Source: Listing 16.x.x

Path\Filename

Page x/y

ALF-5755\_P2\_ALF

ddMMMyyyy

Table 14.2.7.2 PK Parameters for ALF-5755 (PK Population)

|                          |                          | ALF-5755                 |     |
|--------------------------|--------------------------|--------------------------|-----|
|                          |                          | (N=xx)                   |     |
| C <sub>max</sub> (ng/mL) | 1 <sup>st</sup> infusion | N                        |     |
|                          |                          | AM                       |     |
|                          |                          | GM                       |     |
|                          |                          | SD                       |     |
|                          |                          | %CV                      |     |
|                          |                          | Median                   |     |
|                          |                          | Maximum                  |     |
|                          |                          | Minimum                  |     |
|                          |                          | N                        |     |
|                          |                          | AM                       |     |
| 6 <sup>th</sup> infusion |                          | GM                       |     |
|                          |                          | SD                       |     |
|                          |                          | %CV                      |     |
|                          |                          | Median                   |     |
|                          |                          | Maximum                  |     |
|                          |                          | Minimum                  |     |
|                          | T <sub>max</sub> (mins)  | 1 <sup>st</sup> infusion | N   |
|                          |                          |                          | Etc |
|                          | Etc                      |                          |     |

Source: Listing 16.x.x

Path\Filename

Page x/y

*Programming note: Include Accumulation ratio, as defined in Section 11.10*

ALF-5755\_P2\_ALF

ddMMMyyyy

Table 14.3.1.1 Treatment-Emergent Adverse Events (Safety Population)

|                                                         | ALF-5755 (N=xx) |    |         | Placebo (N=xx) |    |         | Total (N=xx) |    |         |
|---------------------------------------------------------|-----------------|----|---------|----------------|----|---------|--------------|----|---------|
|                                                         | n               | N  | %       | n              | N  | %       | n            | N  | %       |
| Treatment Emergent Adverse Events                       | xx              | xx | (xx.x%) | xx             | xx | (xx.x%) | xx           | xx | (xx.x%) |
| Severe Treatment Emergent Adverse Events                | xx              | xx | (xx.x%) | xx             | xx | (xx.x%) | xx           | xx | (xx.x%) |
| Serious Treatment Emergent Adverse Events               | xx              | xx | (xx.x%) | xx             | xx | (xx.x%) | xx           | xx | (xx.x%) |
| Drug-Related Treatment Emergent Adverse Events          | xx              | xx | (xx.x%) | xx             | xx | (xx.x%) | xx           | xx | (xx.x%) |
| Serious Drug-Related Treatment Emergent Adverse Events  | xx              | xx | (xx.x%) | xx             | xx | (xx.x%) | xx           | xx | (xx.x%) |
| Treatment Emergent Adverse Events leading to withdrawal | xx              | xx | (xx.x%) | xx             | xx | (xx.x%) | xx           | xx | (xx.x%) |
| <b>Severity</b>                                         |                 |    |         |                |    |         |              |    |         |
| CTCAE grade 1 or Mild                                   | xx              | xx | (xx.x%) | xx             | xx | (xx.x%) | xx           | xx | (xx.x%) |
| CTCAE grade 2 or Moderate                               | xx              | xx | (xx.x%) | xx             | xx | (xx.x%) | xx           | xx | (xx.x%) |
| CTCAE grade 3 or Severe                                 | xx              | xx | (xx.x%) | xx             | xx | (xx.x%) | xx           | xx | (xx.x%) |
| CTCAE grade 4 or Life-threatening                       | xx              | xx | (xx.x%) | xx             | xx | (xx.x%) | xx           | xx | (xx.x%) |
| CTCAE grade 5 or Death                                  | xx              | xx | (xx.x%) | xx             | xx | (xx.x%) | xx           | xx | (xx.x%) |

n=number of events, N=number of patients, %=percentage of patients  
Drug related is defined as relationship to study drug=possible, probable or definite

Source: Listing 16.x.x

Path\Filename

Page x/y

ALF-5755\_P2\_ALF

ddMMMyyyy

Table 14.3.1.2 Treatment-Emergent Adverse Events, by SOC and PT (Safety Population)

|                   | ALF-5755 (N=xx) |    |         | Placebo (N=xx) |    |         | Total (N=xx) |    |         |
|-------------------|-----------------|----|---------|----------------|----|---------|--------------|----|---------|
|                   | n               | N  | %       | n              | N  | %       | n            | N  | %       |
| Any Adverse Event | xx              | xx | (xx.x%) | xx             | xx | (xx.x%) | xx           | xx | (xx.x%) |
| SOC               | xx              | xx | (xx.x%) | xx             | xx | (xx.x%) | xx           | xx | (xx.x%) |
| PT                | xx              | xx | (xx.x%) | xx             | xx | (xx.x%) | xx           | xx | (xx.x%) |
| PT                | xx              | xx | (xx.x%) | xx             | xx | (xx.x%) | xx           | xx | (xx.x%) |
| Etc               | xx              | xx | (xx.x%) | xx             | xx | (xx.x%) | xx           | xx | (xx.x%) |
| SOC               | xx              | xx | (xx.x%) | xx             | xx | (xx.x%) | xx           | xx | (xx.x%) |
| PT                | xx              | xx | (xx.x%) | xx             | xx | (xx.x%) | xx           | xx | (xx.x%) |
| PT                | xx              | xx | (xx.x%) | xx             | xx | (xx.x%) | xx           | xx | (xx.x%) |
| Etc               | xx              | xx | (xx.x%) | xx             | xx | (xx.x%) | xx           | xx | (xx.x%) |
| Etc               |                 |    |         |                |    |         |              |    |         |

n=number of events, N=number of patients, %=percentage of patients

Source: Listing 16.x.x

Path\Filename

Page x/y

*This layout also applies to:  
Tables 14.3.1.3 to 14.3.1.7*

ALF-5755\_P2\_ALF

ddMMyyyy

Table 14.3.2.1 Listing of Deaths

| Treatment | Centre/ Patient number | Date of first infusion | Date of death |
|-----------|------------------------|------------------------|---------------|
| xxxxxxx   | xx-xxxx                | ddMMyyyy               | ddMMyyyy      |
|           | xx-xxxx                | ddMMyyyy               | ddMMyyyy      |
|           | Etc                    |                        |               |
| Etc       |                        |                        |               |

Repeat for Placebo

Path\Filename

Page x/y



ALF-5755\_P2\_ALF

ddMMMyyyy

Table 14.3.2.2 Listing of Serious Adverse Events

ALF-5755

| Centre/<br>Patient<br>number | Adverse Event<br>Preferred Term<br>SOC Term | Start<br>date | Study<br>day | Stop date<br>/ongoing | Duration<br>of adverse<br>event<br>(days) | Grade <sup>1</sup> | Serious | Relationship<br>to study drug | Treatment                                        | Action taken<br>regarding<br>study drug | Outcome                                  |
|------------------------------|---------------------------------------------|---------------|--------------|-----------------------|-------------------------------------------|--------------------|---------|-------------------------------|--------------------------------------------------|-----------------------------------------|------------------------------------------|
| xxx<br>xxxx                  | xxxxxxx<br>xxxxxxx<br>xxxxxxx               | ddMMMyyyy     | xx           | ddMMMyyyy             | xx                                        | x                  | Yes /No | None/Related                  | None/<br>medication/<br>Surgery/<br>Other: xxxxx | None<br>/Discontinued<br>Etc            | Recovered<br>without<br>sequelae/<br>Etc |
|                              | xxxxxxx<br>xxxxxxx<br>xxxxxxx               | ddMMMyyyy     | xx           | ddMMMyyyy             | xx                                        | x                  | Yes /No | None/Related                  | None/<br>medication/<br>Surgery/<br>Other: xxxxx | None<br>/Discontinued<br>Etc            | Recovered<br>without<br>sequelae/<br>Etc |
|                              | Etc                                         |               |              |                       |                                           |                    |         |                               |                                                  |                                         |                                          |
| xxx<br>xxxx                  | xxxxxxx<br>xxxxxxx<br>xxxxxxx               | ddMMMyyyy     | xx           | ddMMMyyyy             | xx                                        | x                  | Yes /No | None/Related                  | None/<br>medication/<br>Surgery/<br>Other: xxxxx | None<br>/Discontinued<br>Etc            | Recovered<br>without<br>sequelae/<br>Etc |
|                              | Etc                                         |               |              |                       |                                           |                    |         |                               |                                                  |                                         |                                          |
|                              | Etc                                         |               |              |                       |                                           |                    |         |                               |                                                  |                                         |                                          |

<sup>1</sup> CTCAE grade if appropriate or 1=Mild, 2=Moderate, 3=Severe, 4=Life-threatening, 5=Death

Repeat for Placebo

Path\Filename

Page x/y

*This layout also applies to:  
Table 14.3.2.3*

ALF-5755\_P2\_ALF

ddMMMyyyy

Listing 14.3.4 Listing of Abnormal Laboratory Values

| Treatment received | Parameter    | Centre/<br>Patient<br>number | Visit | Result | Unit | Reference range | Comments |                      |
|--------------------|--------------|------------------------------|-------|--------|------|-----------------|----------|----------------------|
| xxxxxx             | xxxxxxxxxxxx | xx-xxxx                      | xxx   | xxx.xx | xxxx | xxx.xx, xxx.xx  | H/L      | xxxxxxxxxxxxxxxxxxxx |
|                    |              |                              | xxx   | xxx.xx | xxxx | xxx.xx, xxx.xx  | H/L      | xxxxxxxxxxxxxxxxxxxx |
|                    |              |                              | xxx   | xxx.xx | xxxx | xxx.xx, xxx.xx  | H/L      | xxxxxxxxxxxxxxxxxxxx |
|                    |              | xx-xxxx                      | xxx   | xxx.xx | xxxx | xxx.xx, xxx.xx  | H/L      | xxxxxxxxxxxxxxxxxxxx |
|                    |              |                              | xxx   | xxx.xx | xxxx | xxx.xx, xxx.xx  | H/L      | xxxxxxxxxxxxxxxxxxxx |
|                    |              |                              | xxx   | xxx.xx | xxxx | xxx.xx, xxx.xx  | H/L      | xxxxxxxxxxxxxxxxxxxx |
|                    |              |                              | xxx   | xxx.xx | xxxx | xxx.xx, xxx.xx  | H/L      | xxxxxxxxxxxxxxxxxxxx |
|                    |              |                              |       | Etc    |      |                 |          |                      |
|                    |              |                              |       | Etc    |      |                 |          |                      |

ALF-5755\_P2\_ALF

ddMMMyyyy

Table 14.3.5.1 Haematology (Safety Population)

|             |         | ALF-5755<br>(N=xx) | Placebo<br>(N=xx) | Total<br>(N=xx) |
|-------------|---------|--------------------|-------------------|-----------------|
| Haemoglobin |         |                    |                   |                 |
| Baseline    | N       | xx                 | xx                | xx              |
|             | Mean    | xx.xx              | xx.xx             | xx.xx           |
|             | SD      | xx.xx              | xx.xx             | xx.xx           |
|             | Median  | xx.xx              | xx.xx             | xx.xx           |
|             | Maximum | xx.x               | xx.x              | xx.x            |
|             | Minimum | xx.x               | xx.x              | xx.x            |
| H0          | N       |                    |                   |                 |
|             | Etc     |                    |                   |                 |
| Etc         |         |                    |                   |                 |
| Hematocrit  | Etc     |                    |                   |                 |
| Etc         |         |                    |                   |                 |

Source: Listing 16.x.x

Path\Filename

Page x/y

*This layout also applies to:*

*Table 14.3.5.2*

*Table 14.3.5.3*

*Table 14.3.5.4*

ALF-5755\_P2\_ALF

ddMMMyyyy

Table 14.3.6 Clinical Examination (Safety Population)

|                    |  | ALF-5755<br>(N=xx)    |            | Placebo<br>(N=xx)     |            | Total<br>(N=xx)       |            |
|--------------------|--|-----------------------|------------|-----------------------|------------|-----------------------|------------|
|                    |  | Baseline <sup>1</sup> |            | Baseline <sup>1</sup> |            | Baseline <sup>1</sup> |            |
|                    |  | Normal                | Abnormal   | Normal                | Abnormal   | Normal                | Abnormal   |
| General appearance |  |                       |            |                       |            |                       |            |
| HO pre-infusion    |  | Normal                | xx (xx.x%) | xx (xx.x%)            | xx (xx.x%) | xx (xx.x%)            | xx (xx.x%) |
|                    |  | Abnormal              | xx (xx.x%) | xx (xx.x%)            | xx (xx.x%) | xx (xx.x%)            | xx (xx.x%) |
|                    |  | Not done <sup>2</sup> | xx         | xx                    | xx         | xx                    | xx         |

Etc

<sup>1</sup> Baseline is the last non-missing value before the first dose of study drug.

<sup>2</sup> Not done box ticked or missing. Patients with no clinical examination at baseline are not included in the summary table

Source: Listing 16.x.x

Path\Filename

Page x/y

ALF-5755\_P2\_ALF

ddMMMyyyy

Table 14.3.7 Vital Signs (Safety Population)

|                                |         | ALF-5755<br>(N=xx) | Placebo<br>(N=xx) | Total<br>(N=xx) |
|--------------------------------|---------|--------------------|-------------------|-----------------|
| Systolic BP (mmHg)             |         |                    |                   |                 |
| Baseline                       | N       | xx                 | xx                | xx              |
|                                | Mean    | xx.xx              | xx.xx             | xx.xx           |
|                                | SD      | xx.xx              | xx.xx             | xx.xx           |
|                                | Median  | xx.xx              | xx.xx             | xx.xx           |
|                                | Maximum | xx.x               | xx.x              | xx.x            |
|                                | Minimum | xx.x               | xx.x              | xx.x            |
| H0 pre-infusion                | N       | xx                 | xx                | xx              |
|                                | Mean    | xx.xx              | xx.xx             | xx.xx           |
|                                | SD      | xx.xx              | xx.xx             | xx.xx           |
|                                | Median  | xx.xx              | xx.xx             | xx.xx           |
|                                | Maximum | xx.x               | xx.x              | xx.x            |
|                                | Minimum | xx.x               | xx.x              | xx.x            |
| Etc                            |         |                    |                   |                 |
| Diastolic BP (mmHg)            | Etc     |                    |                   |                 |
| Heart rate (beats/min)         | Etc     |                    |                   |                 |
| Respiratory rate (breaths/min) | Etc     |                    |                   |                 |
| Temperature (°C)               | Etc     |                    |                   |                 |

Source: Listing 16.x.x

Path\Filename

Page x/y

ALF-5755\_P2\_ALF

ddMMMyyyy

Table 14.3.8 12-lead Electrocardiogram (Safety Population)

|          |              | ALF-5755<br>(N=xx) | Placebo<br>(N=xx) | Total<br>(N=xx) |
|----------|--------------|--------------------|-------------------|-----------------|
| Baseline | Normal       | xx (xx.x%)         | xx (xx.x%)        | xx (xx.x%)      |
|          | Abnormal NCS | xx (xx.x%)         | xx (xx.x%)        | xx (xx.x%)      |
|          | Abnormal CS  | xx (xx.x%)         | xx (xx.x%)        | xx (xx.x%)      |
| H0       | Normal       | xx (xx.x%)         | xx (xx.x%)        | xx (xx.x%)      |
|          | Abnormal NCS | xx (xx.x%)         | xx (xx.x%)        | xx (xx.x%)      |
|          | Abnormal CS  | xx (xx.x%)         | xx (xx.x%)        | xx (xx.x%)      |
| Etc      |              |                    |                   |                 |

Source: Listing 16.x.x

Path\Filename

Page x/y

ALF-5755\_P2\_ALF

ddMMMyyyy

Figure 1.1 PR: Median Change from Baseline (ITT Population)

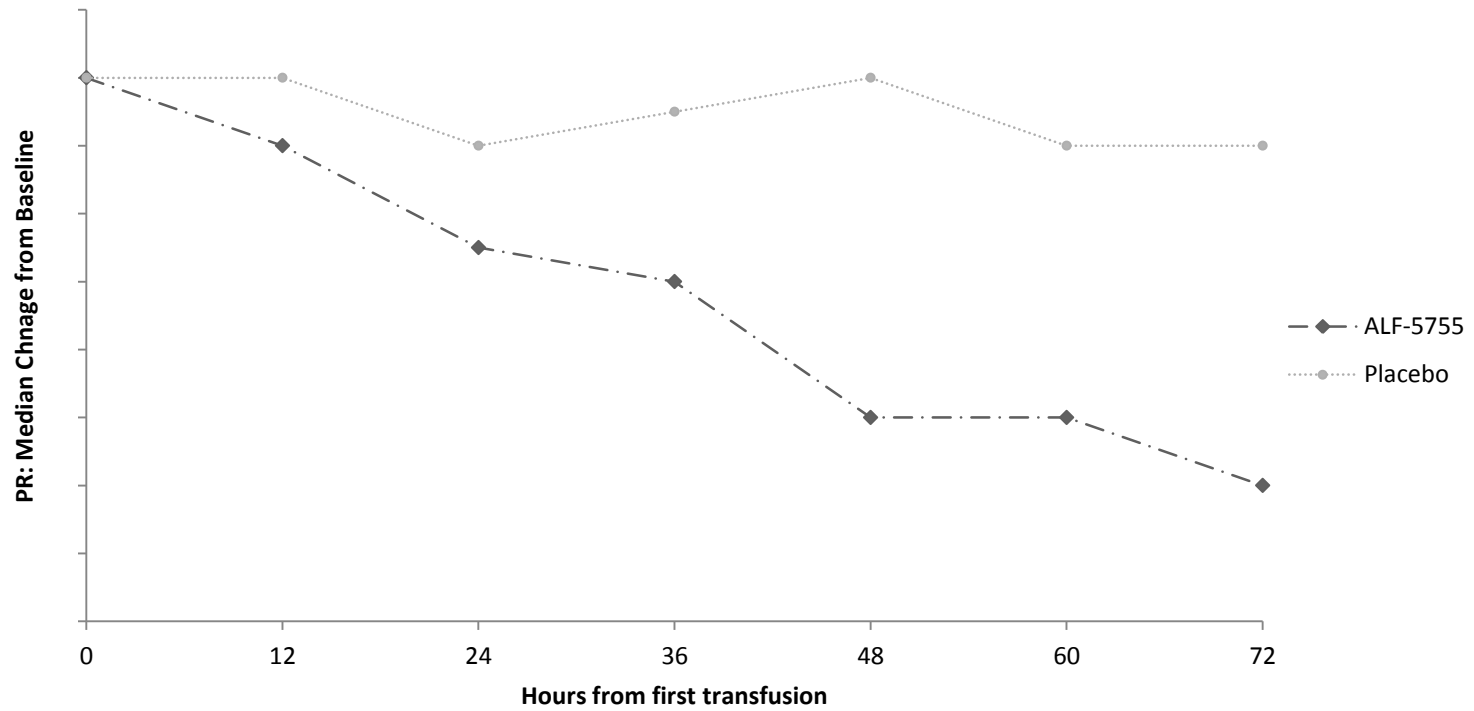

Source: Listing 16.x.x

Path\Filename

Page x/y

*This layout also applies to:  
Figures 1.2, 1.3, 1.4, 1.5, 1.6*

Version date: 16 April 2013

ALF-5755\_P2\_ALF

ddMMMyyyy

Figure 2.1 Kaplan-Meier Plot of Survival (ITT Population)

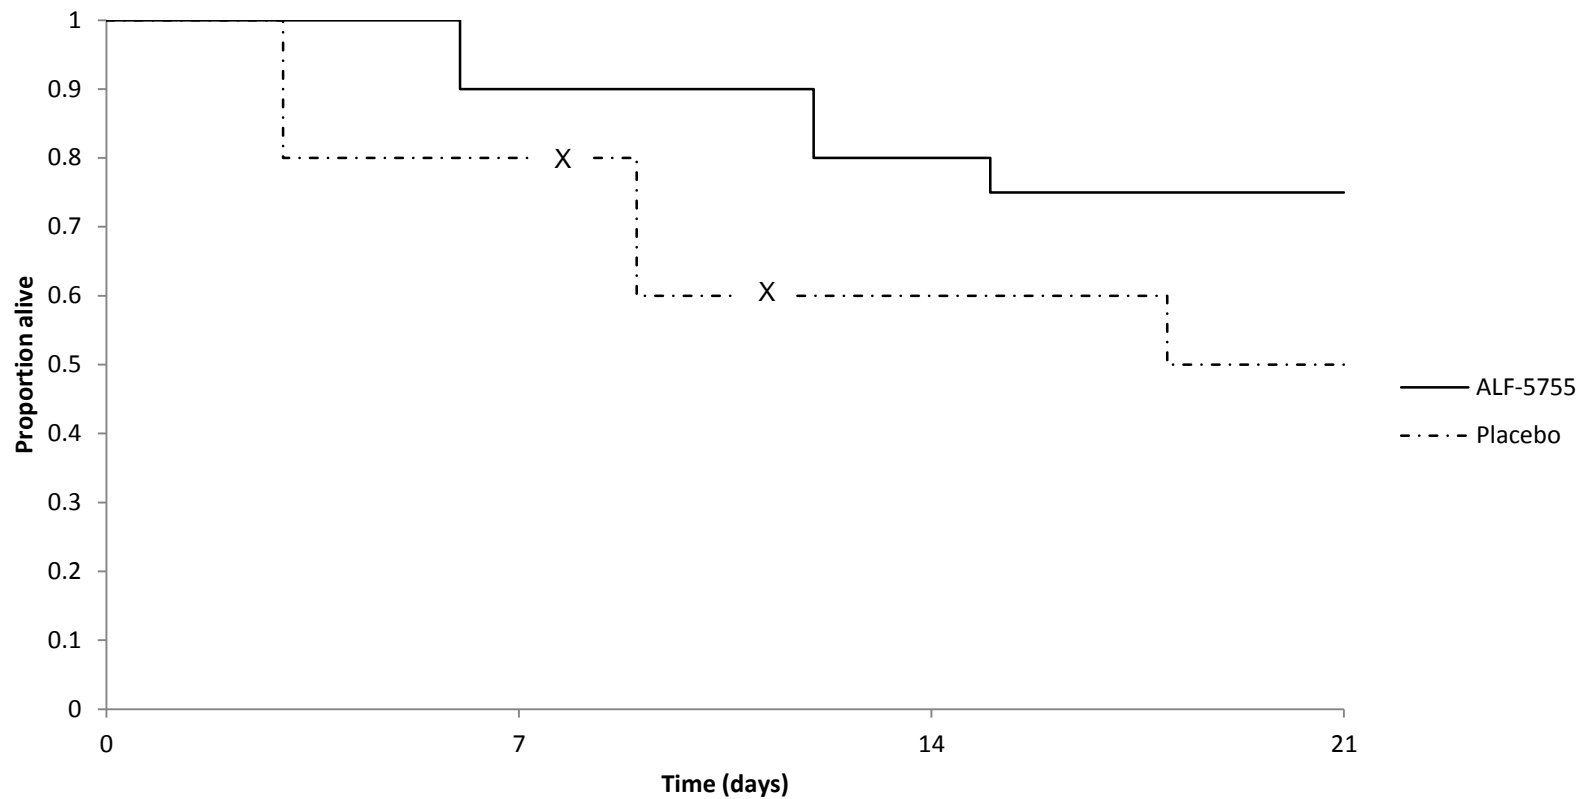

Number known to be alive

|          |    |    |    |    |    |
|----------|----|----|----|----|----|
| ALF-5755 | xx | xx | xx | xx | xx |
| Placebo  | xx | xx | xx | xx | xx |

X indicates censored timed

Source: Listing 16.x.x

Path\Filename

Page x/y

Version date: 16 April 2013



*This layout also applies to:*

*Figure 2.2*

*Figure 2.3*

ALF-5755\_P2\_ALF

ddMMMyyyy

Figure 3 Individual Patient PK Plots of ALF-5755 Concentration (PK Population)

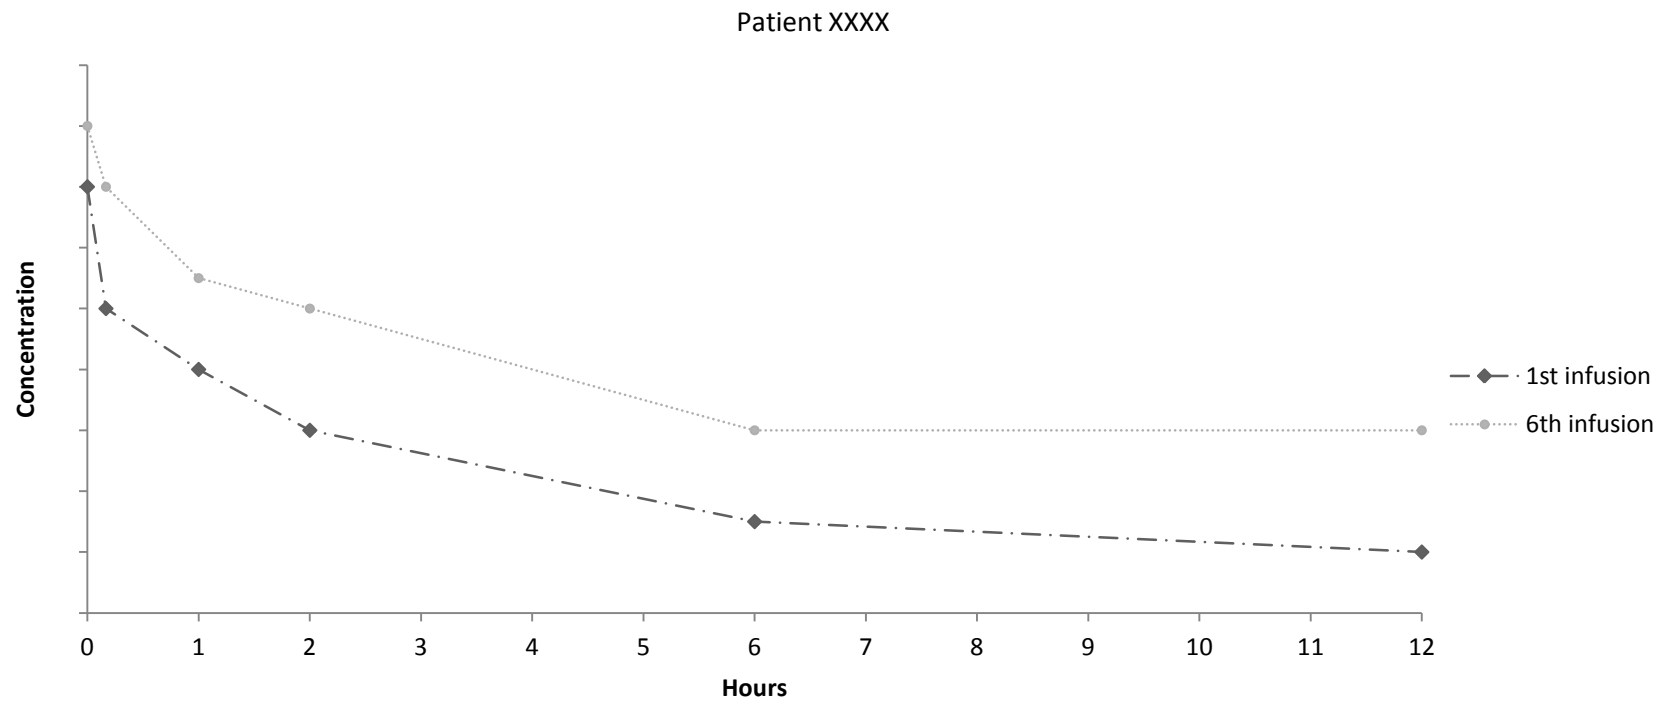

Source: Listing 16.x.x

Path\Filename

Page x/y

ALF-5755\_P2\_ALF

ddMMMyyyy

Figure 4 Mean Plots of Laboratory Parameters (Safety Population)

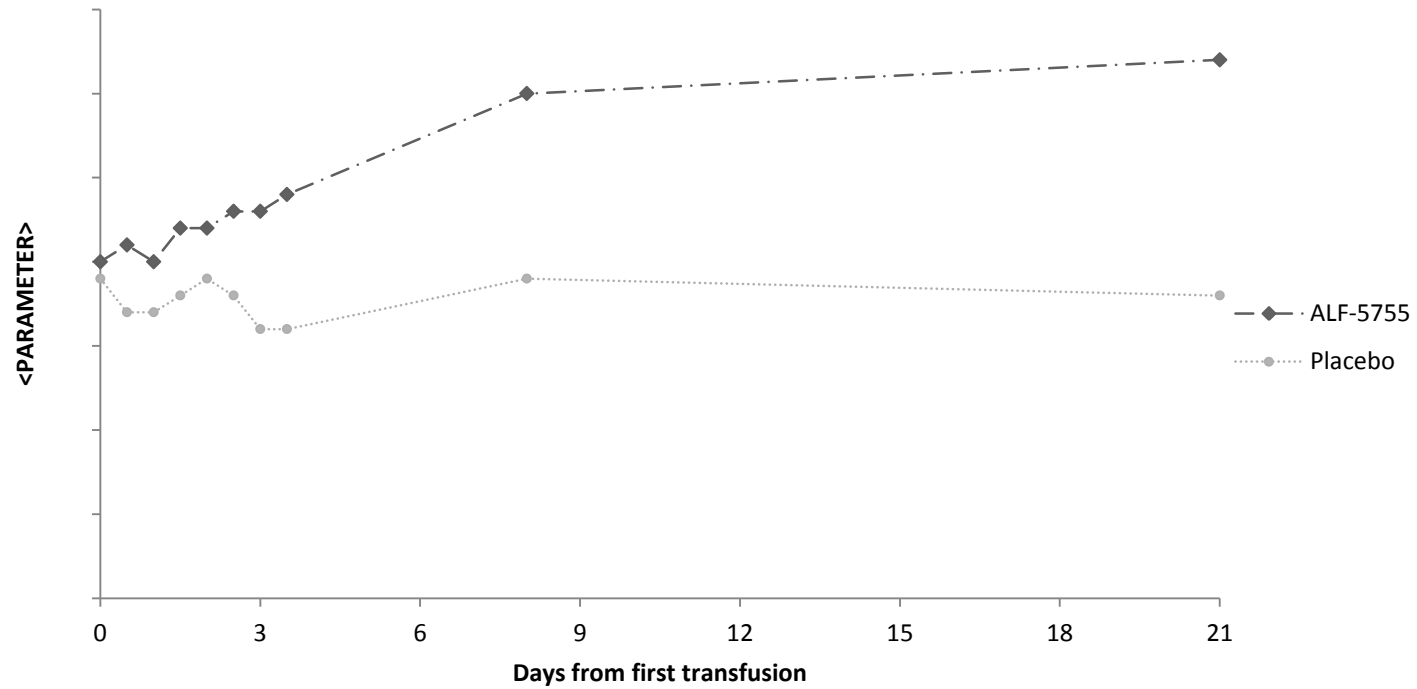

REPEAT FOR PARAMETERS AS AGREED

Source: Listing 16.x.x

Path\Filename

Page x/y

ALF-5755\_P2\_ALF

ddMMMyyyy

Listing 16.2.1 Discontinued Patients

| Treatment | Centre/<br>Patient number | First dose date | Last dose date | Date of<br>withdrawal | Main reason for<br>withdrawal | Other reasons for<br>withdrawal                              |
|-----------|---------------------------|-----------------|----------------|-----------------------|-------------------------------|--------------------------------------------------------------|
| xxxxxx    | xx-xxxx                   | ddMMMyyyy       | ddMMMyyyy      | ddMMMyyyy             | xxxxxxxxxxxxxxxxxxxxxxxxxxxx  |                                                              |
| xxxxxx    | xx-xxxx                   | ddMMMyyyy       | ddMMMyyyy      | ddMMMyyyy             | xxxxxxxxxxxxxxxxxxxxxxxxxxxx  | xxxxxxxxxxxxxxxxxxxxxxxxxxxx<br>xxxxxxxxxxxxxxxxxxxxxxxxxxxx |
| xxxxxx    | xx-xxxx                   | ddMMMyyyy       | ddMMMyyyy      | ddMMMyyyy             | xxxxxxxxxxxxxxxxxxxxxxxxxxxx  | xxxxxxxxxxxxxxxxxxxxxxxxxxxx                                 |
| Etc       |                           |                 |                |                       |                               |                                                              |

Path\Filename

Page x/y

Note to programmer: If reason is AE, include AE number(s)



ALF-5755\_P2\_ALF

ddMMMyyyy

Listing 16.2.3 Patients in the Analysis Populations

| Treatment | Centre/<br>Patient number | Safety Population | ITT Population | PP Population | PK Population |
|-----------|---------------------------|-------------------|----------------|---------------|---------------|
| xxxxxx    | xx-xxxx                   | Yes/No            | Yes/No         | Yes/No        | Yes/No        |
|           | xx-xxxx                   | Yes/No            | Yes/No         | Yes/No        | Yes/No        |
|           | xx-xxxx                   | Yes/No            | Yes/No         | Yes/No        | Yes/No        |
|           | xx-xxxx                   | Yes/No            | Yes/No         | Yes/No        | Yes/No        |
| Etc       |                           |                   |                |               |               |

Page x/y

Path\Filename

ALF-5755\_P2\_ALF

ddMMMyyyy

Listing 16.2.4.1 Demographic Data

| Treatment | Centre/<br>Patient<br>number | Date of<br>randomisation | Date of<br>birth | Age<br>(years<br>) | Gender                   | Beta hCH<br>pregnancy<br>test (date<br>and result) | Race                 | Height<br>(cm) | Weight<br>(kg) | BMI<br>(kg/m <sup>2</sup> ) |
|-----------|------------------------------|--------------------------|------------------|--------------------|--------------------------|----------------------------------------------------|----------------------|----------------|----------------|-----------------------------|
| xxxxxx    | xx-xxxx                      | ddMMMyyyy                | ddMMMyyyy        | xx                 | Male/<br>Female:<br>xxxx | ddMMMyyyy:<br>Negative                             | White/<br>Black/ Etc | xxx.x          | xxx.x          | xxx.x                       |
|           | xx-xxxx                      | ddMMMyyyy                | ddMMMyyyy        | xx                 | Male/<br>Female:<br>xxxx |                                                    | White/<br>Black/ Etc | xxx.x          | xxx.x          | xxx.x                       |
|           | xx-xxxx                      | ddMMMyyyy                | ddMMMyyyy        | xx                 | Male/<br>Female:<br>xxxx | Not done                                           | White/<br>Black/ Etc | xxx.x          | xxx.x          | xxx.x                       |
| Etc       |                              |                          |                  |                    |                          |                                                    |                      |                |                |                             |

Path\Filename

ALF-5755\_P2\_ALF

ddMMMyyyy

Listing 16.2.4.2 Baseline Data

| Treatment | Centre/<br>Patient<br>number | Jaundice (date of<br>onset) | Liver<br>disease<br>diagnosis      | Diagnosis<br>date | Acetaminophen<br>in previous 7<br>days | >4 g/day at<br>least once | Acetaminophen<br>plasma level<br>result | Alcohol<br>plasma level<br>result |
|-----------|------------------------------|-----------------------------|------------------------------------|-------------------|----------------------------------------|---------------------------|-----------------------------------------|-----------------------------------|
| xxxxxx    | xx-xxxx                      | Yes (ddMMMyyyy)/No          | Severe acute<br>hepatitis /<br>Etc | ddMMMyyyy         | Yes/No                                 | Yes/No                    | xxxx <unit>                             | xxxx <unit>                       |
|           | xx-xxxx                      | Yes (ddMMMyyyy)/No          | Severe acute<br>hepatitis /<br>Etc | ddMMMyyyy         | Yes/No                                 | Yes/No                    | xxxx <unit>                             | xxxx <unit>                       |
|           | xx-xxxx                      | Yes (ddMMMyyyy)/No          | Severe acute<br>hepatitis /<br>Etc | ddMMMyyyy         | Yes/No                                 | Yes/No                    | xxxx <unit>                             | xxxx <unit>                       |
|           | xx-xxxx                      | Yes (ddMMMyyyy)/No          | Severe acute<br>hepatitis /<br>Etc | ddMMMyyyy         | Yes/No                                 | Yes/No                    | xxxx <unit>                             | xxxx <unit>                       |
|           | Etc                          |                             |                                    |                   |                                        |                           |                                         |                                   |
| Etc       |                              |                             |                                    |                   |                                        |                           |                                         |                                   |

Path\Filename



ALF-5755\_P2\_ALF

ddMMMyyyy

Listing 16.2.4.3 Hepatitis Etiology

| Treatment | Centre/<br>Patient number | Type 1          | Type 2                      | Type 3 | Specify    |
|-----------|---------------------------|-----------------|-----------------------------|--------|------------|
| xxxxxx    | xx-xxxx                   | Viral hepatitis | Hepatitis A<br>Herpes virus | HSV1   | xxxxxxxxxx |
|           | Etc                       | Etc             |                             |        |            |
| Etc       |                           |                 |                             |        |            |

Page x/y

Path\Filename

Note to programmer: Only list if the box is ticked

ALF-5755\_P2\_ALF

ddMMMyyyy

Listing 16.2.4.4 Baseline Serology Data

| Treatment | Centre/<br>Patient number | Parameter type | Parameter                     | Collection date time | Test result       |
|-----------|---------------------------|----------------|-------------------------------|----------------------|-------------------|
| xxxxxx    | xx-xxxx                   | Hepatitis A    | Anti-HAV-IgM                  | ddMMMyyyy hh:mm      | Positive/Negative |
|           |                           |                | Anti-HAV-total (IgM<br>& IgG) | ddMMMyyyy hh:mm      | Positive/Negative |
|           |                           | Hepatitis B    | HBsAg                         | ddMMMyyyy hh:mm      | Positive/Negative |
|           |                           | Etc            | Ant-HBs                       | ddMMMyyyy hh:mm      | xxx <unit>        |
| Etc       | Etc                       |                |                               |                      |                   |

Path\Filename

ALF-5755\_P2\_ALF

ddMMMyyyy

Listing 16.2.5 Study Drug Exposure

| Treatment | Centre/<br>Patient<br>number | Nominal<br>time | Start time<br>of infusion | Duration | Infusion<br>delayed | Reason  | Infusion<br>volume (ml) | Reason for<br>modification | Total<br>volume (mL) |
|-----------|------------------------------|-----------------|---------------------------|----------|---------------------|---------|-------------------------|----------------------------|----------------------|
| xxxxxx    | xx-xxxx                      | H0              | hh:mm                     | hh:mm    | Yes/No              | xxxxxxx | xx                      | xxxxxxxxxxx                | xxx.x                |
|           |                              | H12             | hh:mm                     | hh:mm    | Yes/No              | xxxxxxx | xx                      | xxxxxxxxxxx                |                      |
|           |                              | H24             | hh:mm                     | hh:mm    | Yes/No              | xxxxxxx | xx                      | xxxxxxxxxxx                |                      |
|           |                              | H36             | hh:mm                     | hh:mm    | Yes/No              | xxxxxxx | xx                      | xxxxxxxxxxx                |                      |
|           |                              | H48             | hh:mm                     | hh:mm    | Yes/No              | xxxxxxx | xx                      | xxxxxxxxxxx                |                      |
|           |                              | H60             | hh:mm                     | hh:mm    | Yes/No              | xxxxxxx | xx                      | xxxxxxxxxxx                |                      |
|           | xx-xxxx                      | H0              | hh:mm                     | hh:mm    | Yes/No              | xxxxxxx | xx                      | xxxxxxxxxxx                |                      |
|           |                              | Etc             |                           |          |                     |         |                         |                            |                      |
| Etc       |                              |                 |                           |          |                     |         |                         |                            |                      |

\*Outside the visit window

Path\Filename

ALF-5755\_P2\_ALF

ddMMMyyyy

Listing 16.2.6 Efficacy Response Data

| Treatment | Centre/<br>Patient<br>number | Rate of<br>change of<br>PR (0-72H) | Rate of<br>change of<br>FV (0-72H) | Rate of<br>change of<br>INR (0-72H) | Rate of<br>change of<br>ALT (0-72H) | Rate of<br>change of<br>AST (0-72H) | Change in<br>HE grade<br>(0-72H) | Status at<br>D21                              | Days in<br>hospital |
|-----------|------------------------------|------------------------------------|------------------------------------|-------------------------------------|-------------------------------------|-------------------------------------|----------------------------------|-----------------------------------------------|---------------------|
| xxxxxx    | xx-xxxx                      | xx.x                               | xx.x                               | xx.x                                | xx.x                                | xx.x                                | x                                | Transplant-<br>free/<br>Transplante<br>d/Dead | xx                  |
|           | xx-xxxx                      | xx.x                               | xx.x                               | xx.x                                | xx.x                                | xx.x                                | x                                | Transplant-<br>free/<br>Transplante<br>d/Dead | xx                  |
|           | xx-xxxx                      | xx.x                               | xx.x                               | xx.x                                | xx.x                                | xx.x                                | x                                | Transplant-<br>free/<br>Transplante<br>d/Dead | xx                  |
|           | xx-xxxx                      | xx.x                               | xx.x                               | xx.x                                | xx.x                                | xx.x                                | x                                | Transplant-<br>free/<br>Transplante<br>d/Dead | xx                  |

Etc

\*Outside the visit window

Path\Filename

ALF-5755\_P2\_ALF

ddMMMyyyy

Listing 16.2.7 Adverse Events

ALF-5755

| Centre/<br>Patient<br>number | AE<br>no | Adverse Event<br>Preferred Term<br>SOC Term | Start<br>date | Study<br>day | Stop date<br>/ongoing | Duration<br>of adverse<br>event<br>(days) | Grade <sup>1</sup> | Serious | Relationship<br>to study drug | Treatment                                        | Action taken<br>regarding<br>study drug | Outcome                                  |
|------------------------------|----------|---------------------------------------------|---------------|--------------|-----------------------|-------------------------------------------|--------------------|---------|-------------------------------|--------------------------------------------------|-----------------------------------------|------------------------------------------|
| xxx<br>xxxx                  | xx       | xxxxxxxxx<br>xxxxxxxxx<br>xxxxxxxxx         | ddMMMyyyy     | xx           | ddMMMyyyy             | xx                                        | x                  | Yes /No | None/Related                  | None/<br>medication/<br>Surgery/<br>Other: xxxxx | None<br>/Discontinued<br>Etc            | Recovered<br>without<br>sequelae/<br>Etc |
|                              | xx       | xxxxxxxxx<br>xxxxxxxxx<br>xxxxxxxxx         | ddMMMyyyy     | xx           | ddMMMyyyy             | xx                                        | x                  | Yes /No | None/Related                  | None/<br>medication/<br>Surgery/<br>Other: xxxxx | None<br>/Discontinued<br>Etc            | Recovered<br>without<br>sequelae/<br>Etc |
|                              |          | Etc                                         |               |              |                       |                                           |                    |         |                               |                                                  |                                         |                                          |
| xxx<br>xxxx                  | xx       | xxxxxxxxx<br>xxxxxxxxx<br>xxxxxxxxx         | ddMMMyyyy     | xx           | ddMMMyyyy             | xx                                        | x                  | Yes /No | None/Related                  | None/<br>medication/<br>Surgery/<br>Other: xxxxx | None<br>/Discontinued<br>Etc            | Recovered<br>without<br>sequelae/<br>Etc |
|                              |          | Etc                                         |               |              |                       |                                           |                    |         |                               |                                                  |                                         |                                          |
|                              |          | Etc                                         |               |              |                       |                                           |                    |         |                               |                                                  |                                         |                                          |

<sup>1</sup> CTCAE grade if appropriate or 1=Mild, 2=Moderate, 3=Severe, 4=Life-threatening, 5=Death

Repeat for Placebo

Path\Filename

Page x/y

ALF-5755\_P2\_ALF

ddMMMyyyy

Listing 16.2.8.1 Haematology

| Treatment received | Centre/<br>Patient number | Parameter   | Visit | Result | Unit | Reference range | Clinical significance |    |  |
|--------------------|---------------------------|-------------|-------|--------|------|-----------------|-----------------------|----|--|
| xxxxxx             | xx-xxxx                   | xxxxxxxxxxx | xxx   | xxx.xx | xxxx | xxx.xx, xxx.xx  | H/L CS                |    |  |
|                    |                           |             | xxx   | xxx.xx | xxxx | xxx.xx, xxx.xx  | H/L                   |    |  |
|                    |                           |             | xxx   | xxx.xx | xxxx | xxx.xx, xxx.xx  | H/L                   |    |  |
|                    |                           | xxxxxxxxxxx | xxx   | xxx.xx | xxxx | xxx.xx, xxx.xx  | H/L                   | CS |  |
|                    |                           |             | xxx   | xxx.xx | xxxx | xxx.xx, xxx.xx  | H/L                   |    |  |
|                    |                           |             | *xxx  | xxx.xx | xxxx | xxx.xx, xxx.xx  | H/L                   |    |  |
|                    |                           |             | xxx   | xxx.xx | xxxx | xxx.xx, xxx.xx  | H/L                   |    |  |
|                    |                           |             |       |        | Etc  |                 |                       |    |  |
|                    |                           | Etc         |       |        |      |                 |                       |    |  |

\*Outside the visit window

Path\Filename

Page x/y

*This layout also applies to:*

*Listing 16.2.8.2*

*Listing 16.2.8.4*

*Listing 16.2.8.5*

ALF-5755\_P2\_ALF

ddMMMyyyy

Listing 16.2.8.3 Urinalysis

| Treatment | Centre/<br>Patient number | Visit | Dipstick result          | Local lab result                |
|-----------|---------------------------|-------|--------------------------|---------------------------------|
| xxxxxx    | xx-xxxx                   | xxx   | Normal/Abnormal/Not done |                                 |
|           |                           | xxx   | Normal/Abnormal/Not done |                                 |
|           |                           | xxx   | Normal/Abnormal/Not done | Normal/Abnormal NCS/Abnormal CS |
|           |                           | xxx   | Normal/Abnormal/Not done |                                 |
| Etc       |                           |       |                          |                                 |

\*Outside the visit window

Path\Filename

ALF-5755\_P2\_ALF

ddMMMyyyy

Listing 16.4.1 Final Status

| Treatment | Centre/<br>Patient<br>number | First dose<br>date | Last dose<br>date | Completed<br>treatment | Completed all<br>visits | Primary reason for<br>discontinuation | Secondary reasons for<br>discontinuation         |
|-----------|------------------------------|--------------------|-------------------|------------------------|-------------------------|---------------------------------------|--------------------------------------------------|
| xxxxxx    | xx-xxxx                      | ddMMMyyyy          | ddMMMyyyy         | Yes/No                 | Yes/No                  | xxxxxxxxxxxxxxxxxxxxxx                | xxxxxxxxxxxxxxxxxxxxxx<br>xxxxxxxxxxxxxxxxxxxxxx |
|           | xx-xxxx                      | ddMMMyyyy          | ddMMMyyyy         | Yes/No                 | Yes/No                  | xxxxxxxxxxxxxxxxxxxxxx                | xxxxxxxxxxxxxxxxxxxxxx                           |
|           | xx-xxxx                      | ddMMMyyyy          | ddMMMyyyy         | Yes/No                 | Yes/No                  | xxxxxxxxxxxxxxxxxxxxxx                | xxxxxxxxxxxxxxxxxxxxxx                           |
| Etc       |                              |                    |                   |                        |                         |                                       |                                                  |

Path\Filename

Note to programmer: Under reason include all additional information provided, including AE nos, date of last contact and other:specify



ALF-5755\_P2\_ALF

ddMMMyyyy

Listing 16.4.2 Visit Dates

| Treatment | Centre/<br>Patient number | Visit | Date      |
|-----------|---------------------------|-------|-----------|
| xxxxxx    | xx-xxxx                   | xx    | ddMMMyyyy |
|           |                           | xx    | ddMMMyyyy |
|           |                           | *xx   | ddMMMyyyy |
|           |                           | xx    | ddMMMyyyy |
| Etc       |                           |       |           |

\*Outside the visit window

Path\Filename

Note to programmer: include date of consent and assessment/collection dates if not listed elsewhere

ALF-5755\_P2\_ALF

ddMMMyyyy

Listing 16.4.3.1 Inclusion Criteria

---

Definition of criteria

---

1. xxxxxxxxxxxxxxxxxxxxxxxxx
  2. xxxxxxxxxxxxxxxxxxxxxxxxx
- Etc
- 

Page x/y

Path\Filename

*Note: The list of criteria will be presented on the first pages of the listing. Patient data will start on the subsequent page.*

Note to programmer: List criteria for each version of the protocol

ALF-5755\_P2\_ALF

ddMMMyyyy

Listing 16.4.3.1 Inclusion Criteria

| Treatment | Centre/<br>Patient<br>number | Protocol<br>version | Criteria |        |        |        |           |        |
|-----------|------------------------------|---------------------|----------|--------|--------|--------|-----------|--------|
|           |                              |                     | 1        | 2      | 3      | 4      | 5         | 6      |
| xxxxxx    | xx-xxxx                      | xxxxxxxx            | Yes/No   | Yes/No | Yes/No | Yes/No | Yes/No/NA | Yes/No |
|           | xx-xxxx                      | xxxxxxxx            | Yes/No   | Yes/No | Yes/No | Yes/No | Yes/No/NA | Yes/No |
|           | xx-xxxx                      | xxxxxxxx            | Yes/No   | Yes/No | Yes/No | Yes/No | Yes/No/NA | Yes/No |
| Etc       |                              |                     |          |        |        |        |           |        |

Page x/y

Path\Filename

This layout also applies to:  
 Listing 16.4.3.2

ALF-5755\_P2\_ALF

ddMMMyyyy

Listing 16.4.3.3 Eligibility Confirmation and Randomisation Status

| Treatment | Centre/<br>Patient number | Date of<br>randomisation | Randomisation number | PK blood sampling | CK18 blood sampling |
|-----------|---------------------------|--------------------------|----------------------|-------------------|---------------------|
| xxxxxx    | xx-xxxx                   | ddMMMyyyy                | Rxxxxx               | Yes/No            | Yes/No              |
|           | xx-xxxx                   | ddMMMyyyy                | Rxxxxx               | Yes/No            | Yes/No              |
|           | xx-xxxx                   | ddMMMyyyy                | Rxxxxx               | Yes/No            | Yes/No              |
|           | xx-xxxx                   | ddMMMyyyy                | Rxxxxx               | Yes/No            | Yes/No              |
| Etc       |                           |                          |                      |                   |                     |

Path\Filename

ALF-5755\_P2\_ALF

ddMMMyyyy

Listing 16.4.4 Medical History

| Treatment | Centre/<br>Patient<br>number | Body system | Description | Start date | Related to<br>liver<br>disease | Ongoing | Current CTC<br>grade | Currently<br>treated |
|-----------|------------------------------|-------------|-------------|------------|--------------------------------|---------|----------------------|----------------------|
| xxxxxx    | xx-xxxx                      | xx-xxxxxxxx | xxxxxxxx    | ddMMMyyyy  | Yes/No                         | Yes/No  | x                    | Yes/No               |
|           | xx-xxxx                      | xx-xxxxxxxx | xxxxxxxx    | ddMMMyyyy  | Yes/No                         | Yes/No  | x                    | Yes/No               |
|           | xx-xxxx                      | xx-xxxxxxxx | xxxxxxxx    | ddMMMyyyy  | Yes/No                         | Yes/No  | x                    | Yes/No               |
|           | xx-xxxx                      | xx-xxxxxxxx | xxxxxxxx    | ddMMMyyyy  | Yes/No                         | Yes/No  | x                    | Yes/No               |
| Etc       |                              |             |             |            |                                |         |                      |                      |

Path\Filename

ALF-5755\_P2\_ALF

ddMMMyyyy

Listing 16.4.5.1 Concomitant Medications

| Treatment | Centre/<br>Patient<br>number | Med<br>no | AE<br>no | Therapy<br>ATC Code<br>PT                          | Route | Total<br>daily<br>dose | Unit | Start date<br>(Stop<br>date/ongoing) | Time in relation<br>to treatment | Reason for<br>medication     |
|-----------|------------------------------|-----------|----------|----------------------------------------------------|-------|------------------------|------|--------------------------------------|----------------------------------|------------------------------|
| xxxxxx    | xx-xxxx                      | xx        | xx       | xxxxxxxxxxxxxx<br>xxxxxxxxxxxxxx<br>xxxxxxxxxxxxxx | xxx   | xx.x                   | xxx  | ddMMMyyyy<br>(ddMMMyyyy/<br>ongoing) | Prior/<br>Concomitant/<br>Change | xxxxxxxxxxxxxxxxxx<br>xxxxxx |
|           |                              | xx        | xx       | xxxxxxxxxxxxxx<br>xxxxxxxxxxxxxx<br>xxxxxxxxxxxxxx | xxx   | xx.x                   | xxx  | ddMMMyyyy<br>(ddMMMyyyy/<br>ongoing) | Prior/<br>Concomitant/<br>Change | xxxxxxxxxxxxxxxxxx<br>xxxxxx |
|           |                              | xx        | xx       | xxxxxxxxxxxxxx<br>xxxxxxxxxxxxxx<br>xxxxxxxxxxxxxx | xxx   | xx.x                   | xxx  | ddMMMyyyy<br>(ddMMMyyyy/<br>ongoing) | Prior/<br>Concomitant/<br>Change | xxxxxxxxxxxxxxxxxx<br>xxxxxx |
|           |                              | xx        | xx       | xxxxxxxxxxxxxx<br>xxxxxxxxxxxxxx<br>xxxxxxxxxxxxxx | xxx   | xx.x                   | xxx  | ddMMMyyyy<br>(ddMMMyyyy/<br>ongoing) | Prior/<br>Concomitant/<br>Change | xxxxxxxxxxxxxxxxxx<br>xxxxxx |
| Etc       |                              |           |          |                                                    |       |                        |      |                                      |                                  |                              |

Path\Filename

ALF-5755\_P2\_ALF

ddMMMyyyy

Listing 16.4.5.2 Concomitant Procedures

| Treatment | Centre/<br>Patient<br>number | Procedure<br>no. | AE no. | Procedure      | Frequency | Start date<br>(Stop<br>date/ongoing) | Time in relation<br>to treatment | Reason for<br>procedure  |
|-----------|------------------------------|------------------|--------|----------------|-----------|--------------------------------------|----------------------------------|--------------------------|
| xxxxxx    | xx-xxxx                      | xx               | xx     | xxxxxxxxxxxxxx | xx        | ddMMMyyyy<br>(ddMMMyyyy/<br>ongoing) | Prior/<br>Concomitant/<br>Change | xxxxxxxxxxxxxx<br>xxxxxx |
|           |                              | xx               | xx     | xxxxxxxxxxxxxx | xx        | ddMMMyyyy<br>(ddMMMyyyy/<br>ongoing) | Prior/<br>Concomitant/<br>Change | xxxxxxxxxxxxxx<br>xxxxxx |
|           |                              | xx               | xx     | xxxxxxxxxxxxxx | xx        | ddMMMyyyy<br>(ddMMMyyyy/<br>ongoing) | Prior/<br>Concomitant/<br>Change | xxxxxxxxxxxxxx<br>xxxxxx |
|           |                              | xx               | xx     | xxxxxxxxxxxxxx | xx        | ddMMMyyyy<br>(ddMMMyyyy/<br>ongoing) | Prior/<br>Concomitant/<br>Change | xxxxxxxxxxxxxx<br>xxxxxx |
| Etc       |                              |                  |        |                |           |                                      |                                  |                          |

Path\Filename

ALF-5755\_P2\_ALF

ddMMMyyyy

Listing 16.4.5.3 Concomitant Surgery

| Treatment | Centre/<br>Patient<br>number | Surgery<br>no. | AE no. | Surgery<br>description | Date      | Time in relation<br>to treatment | Reason for surgery     |
|-----------|------------------------------|----------------|--------|------------------------|-----------|----------------------------------|------------------------|
| xxxxxx    | xx-xxxx                      | xx             | xx     | xxxxxxxxxxxxxx         | ddMMMyyyy | Prior/<br>Concomitant/<br>Change | xxxxxxxxxxxxxxxxxxxxxx |
|           |                              | xx             | xx     | xxxxxxxxxxxxxx         | ddMMMyyyy | Prior/<br>Concomitant/<br>Change | xxxxxxxxxxxxxxxxxxxxxx |
|           |                              | xx             | xx     | xxxxxxxxxxxxxx         | ddMMMyyyy | Prior/<br>Concomitant/<br>Change | xxxxxxxxxxxxxxxxxxxxxx |
|           |                              | xx             | xx     | xxxxxxxxxxxxxx         | ddMMMyyyy | Prior/<br>Concomitant/<br>Change | xxxxxxxxxxxxxxxxxxxxxx |
| Etc       |                              |                |        |                        |           |                                  |                        |

Path\Filename



ALF-5755\_P2\_ALF

ddMMMyyyy

Listing 16.4.6.1 Hemostasis

| Treatment | Centre/<br>Patient number | Visit    | Test              | result | Units | Outside normal<br>range | Clinically<br>significant |  |  |
|-----------|---------------------------|----------|-------------------|--------|-------|-------------------------|---------------------------|--|--|
| xxxxxx    | xx-xxxx                   | Baseline | Prothrombin ratio | xxx    |       | Yes/No                  | Yes/No                    |  |  |
|           |                           |          | Factor V          | xxx    | %     | Yes/No                  | Yes/No                    |  |  |
|           |                           |          | INR               | xxx    |       | Yes/No                  | Yes/No                    |  |  |
|           |                           |          | Fibrinogen        | xxx    | g/L   | Yes/No                  | Yes/No                    |  |  |
|           |                           | H0       | Prothrombin ratio | xxx    |       | Yes/No                  | Yes/No                    |  |  |
|           |                           |          | Factor V          | xxx    | %     | Yes/No                  | Yes/No                    |  |  |
|           |                           |          | INR               | xxx    |       | Yes/No                  | Yes/No                    |  |  |
|           |                           |          | Fibrinogen        | xxx    | g/L   | Yes/No                  | Yes/No                    |  |  |
|           |                           |          |                   | Etc    |       |                         |                           |  |  |
|           |                           | Etc      |                   |        |       |                         |                           |  |  |

\*Outside the visit window

Path\Filename

ALF-5755\_P2\_ALF

ddMMMyyyy

Listing 16.4.6.2 Transplantation and Hospitalisation

| Treatment | Centre/<br>Patient<br>number | Liver<br>transplant<br>required | Transplantation<br>by D21 | Date of<br>transplant | Reason     | Hospitalised<br>on Day 8 | Hospitalised<br>on D21 | Date of<br>discharge |
|-----------|------------------------------|---------------------------------|---------------------------|-----------------------|------------|--------------------------|------------------------|----------------------|
| xxxxxx    | xx-xxxx                      | Yes/No                          | Yes/No                    | ddMMMyyyy             | xxxxxxxxxx | Yes/No                   | Yes/No                 | ddMMMyyyy            |
|           |                              | Yes/No                          | Yes/No                    | ddMMMyyyy             | xxxxxxxxxx | Yes/No                   | Yes/No                 | ddMMMyyyy            |
|           |                              | Yes/No                          | Yes/No                    | ddMMMyyyy             | xxxxxxxxxx | Yes/No                   | Yes/No                 | ddMMMyyyy            |
| Etc       |                              |                                 |                           |                       |            |                          |                        |                      |

\*Outside the visit window

Path\Filename

ALF-5755\_P2\_ALF

ddMMMyyyy

Listing 16.4.6.3 Hepatic Encephalopathy and Glasgow Coma Scale

| Treatment | Centre/<br>Patient number | Visit    | HE grade | GCS |
|-----------|---------------------------|----------|----------|-----|
| xxxxxx    | xx-xxxx                   | Baseline | x        | xx  |
|           |                           | D1       | x        | xx  |
|           |                           | D12      | x        | xx  |
|           |                           | Etc      |          |     |
| Etc       |                           |          |          |     |

\*Outside the visit window

Page x/y

Path\Filename

ALF-5755\_P2\_ALF

ddMMMyyyy

Listing 16.4.6.4 Survival Status

| Treatment | Centre/<br>Patient number | Alive on D21 | Date of death | Autopsy        | Primary cause of<br>death |
|-----------|---------------------------|--------------|---------------|----------------|---------------------------|
| xxxxxx    | xx-xxxx                   | Yes/No       | ddMMMyyyy     | Yes/No/Unknown | xxxxxxxxxx                |
|           |                           | Yes/No       | ddMMMyyyy     | Yes/No/Unknown | xxxxxxxxxx                |
|           |                           | Yes/No       | ddMMMyyyy     | Yes/No/Unknown | xxxxxxxxxx                |
| Etc       |                           |              |               |                |                           |

\*Outside the visit window

Page x/y

Path\Filename

ALF-5755\_P2\_ALF

ddMMMyyyy

Listing 16.4.7.1 PK Data

| Treatment | Centre/<br>Patient number | Visit      | Collection date<br>and time | On time as per<br>protocol | Concentration | Units |
|-----------|---------------------------|------------|-----------------------------|----------------------------|---------------|-------|
| xxxxxx    | xx-xxxx                   | H0         | ddMMMyyyy hh:mm             | Yes/No: specify            | xx.x          | xx    |
|           |                           | H0 10 mins | ddMMMyyyy hh:mm             | Yes/No: specify            | xx.x          | xx    |
|           |                           | H1         | ddMMMyyyy hh:mm             | Yes/No: specify            | xx.x          | xx    |
|           |                           | H2         | ddMMMyyyy hh:mm             | Yes/No: specify            | xx.x          | xx    |
| Etc       |                           | Etc        |                             |                            |               |       |

\*Outside the visit window

Path\Filename

ALF-5755\_P2\_ALF

ddMMMyyyy

Listing 16.4.7.2 PK Parameters

| Treatment | Centre/<br>Patient<br>number | Visit                    | C <sub>max</sub> | T <sub>max</sub> | k    | t <sub>½</sub> | AUC <sub>0-12</sub> | AUC <sub>0-t</sub> | R    |
|-----------|------------------------------|--------------------------|------------------|------------------|------|----------------|---------------------|--------------------|------|
| xxxxxx    | xx-xxxx                      | 1 <sup>st</sup> infusion | xx.x             | xx               | x.xx | xx             | xx.x                | xx.x               |      |
|           |                              | 6 <sup>th</sup> infusion | xx.x             | xx               | x.xx | xx             | xx.x                | xx.x               | x.xx |
|           | xx-xxxx                      | 1 <sup>st</sup> infusion | xx.x             | xx               | x.xx | xx             | xx.x                | xx.x               |      |
|           |                              | 6 <sup>th</sup> infusion | xx.x             | xx               | x.xx | xx             | xx.x                | xx.x               | x.xx |
|           |                              | Etc                      |                  |                  |      |                |                     |                    |      |
| Etc       |                              |                          |                  |                  |      |                |                     |                    |      |

Path\Filename

ALF-5755\_P2\_ALF

ddMMMyyyy

Listing 16.4.8 CK18 Sampling

| Treatment | Centre/<br>Patient number | Visit | Sample collected | Collection date and<br>time | On time as per<br>protocol |
|-----------|---------------------------|-------|------------------|-----------------------------|----------------------------|
| xxxxxx    | xx-xxxx                   | H0    | Yes/No: specify  | ddMMMyyyy hh:mm             | Yes/No: specify            |
|           |                           | H12   | Yes/No: specify  | ddMMMyyyy hh:mm             | Yes/No: specify            |
|           |                           | H24   | Yes/No: specify  | ddMMMyyyy hh:mm             | Yes/No: specify            |
|           |                           | Etc   |                  |                             |                            |
| Etc       |                           |       |                  |                             |                            |

Path\Filename

ALF-5755\_P2\_ALF

ddMMMyyyy

Listing 16.4.9 Clinical Examination

| Treatment | Centre/<br>Patient number | Visit | Record no | Body system        | Status                   | Abnormality                  |
|-----------|---------------------------|-------|-----------|--------------------|--------------------------|------------------------------|
| xxxxxx    | xx-xxxx                   | xx    | xx        | General appearance | Normal/Abnormal/Not done | xxxxxxxxxxxxxxxxxxxxxxxxxxxx |
|           |                           |       |           | Skin               | Normal/Abnormal/Not done | xxxxxxxxxxxxxxxxxxxxxxxxxxxx |
|           |                           |       |           | HEENT              | Normal/Abnormal/Not done | xxxxxxxxxxxxxxxxxxxxxxxxxxxx |
|           |                           |       |           | Lymph nodes        | Normal/Abnormal/Not done | xxxxxxxxxxxxxxxxxxxxxxxxxxxx |
|           |                           |       |           | Etc                |                          |                              |
|           |                           | *xx   | *xx       | General appearance | Normal/Abnormal/Not done | xxxxxxxxxxxxxxxxxxxxxxxxxxxx |
|           |                           |       |           | Skin               | Normal/Abnormal/Not done | xxxxxxxxxxxxxxxxxxxxxxxxxxxx |
|           |                           |       |           | HEENT              | Normal/Abnormal/Not done | xxxxxxxxxxxxxxxxxxxxxxxxxxxx |
|           |                           |       |           | Lymph nodes        | Normal/Abnormal/Not done | xxxxxxxxxxxxxxxxxxxxxxxxxxxx |
|           |                           |       |           | Etc                |                          |                              |

Etc

\*Outside the visit window

Path\Filename



ALF-5755\_P2\_ALF

ddMMMyyyy

Listing 16.4.10 Vital Signs

| Treatment | Centre/<br>Patient number | Visit | Systolic BP<br>(mmHg) | Diastolic BP<br>(mmHg) | Heart rate<br>(beats/min) | Respiratory<br>rate<br>(breaths/min) | Body<br>temperature<br>(°C) |
|-----------|---------------------------|-------|-----------------------|------------------------|---------------------------|--------------------------------------|-----------------------------|
| xxxxxx    | xx-xxxx                   | xx    | xxx                   | xxx                    | xxx                       | xx                                   | xx.x                        |
|           |                           | xx    | xxx                   | xxx                    | xxx                       | xx                                   | xx.x                        |
|           |                           | *xx   | xxx                   | xxx                    | xxx                       | xx                                   | xx.x                        |
|           |                           | xx    | xxx                   | xxx                    | xxx                       | xx                                   | xx.x                        |

Etc

\*Outside the visit window

Path\Filename

ALF-5755\_P2\_ALF

ddMMMyyyy

Listing 16.4.11 12-Lead Electrocardiogram

| Treatment | Centre/<br>Patient number | Visit    | Evaluation       | Abnormality | Clinical<br>significance |
|-----------|---------------------------|----------|------------------|-------------|--------------------------|
| xxxxxx    | xx-xxxx                   | Baseline | Normal/ Abnormal | xxxxxxxxxxx | CS                       |
|           |                           | H0 Pre   | Normal/ Abnormal | xxxxxxxxxxx |                          |
|           |                           | H0 Post  |                  |             |                          |
|           |                           | H1       | Normal/ Abnormal | xxxxxxxxxxx | CS                       |
| Etc       |                           |          |                  |             |                          |

Path\Filename

ALF-5755\_P2\_ALF

ddMMMyyyy

Listing 16.4.12 Arterial Blood Gas with Lactates

| Treatment | Centre/<br>Patient<br>number | Date and time of<br>collection | pH  | PaO <sub>2</sub> | PaCo <sub>2</sub> | HCO <sub>3</sub> | Bass excess | Lactates |
|-----------|------------------------------|--------------------------------|-----|------------------|-------------------|------------------|-------------|----------|
| xxxxxx    | xx-xxxx                      | ddMMMyyyy HH:MM                | xxx | xxx              | xxx               | xxx              | xxx         | xxx      |
|           | xx-xxxx                      | ddMMMyyyy HH:MM                | xxx | xxx              | xxx               | xxx              | xxx         | xxx      |
|           | xx-xxxx                      | ddMMMyyyy HH:MM                | xxx | xxx              | xxx               | xxx              | xxx         | xxx      |
|           | xx-xxxx                      | ddMMMyyyy HH:MM                | xxx | xxx              | xxx               | xxx              | xxx         | xxx      |
| Etc       |                              |                                |     |                  |                   |                  |             |          |

Path\Filename

ALF-5755\_P2\_ALF

ddMMMyyyy

Listing 16.4.13 Other Sampling Collection Data

| Treatment | Centre/<br>Patient number | Sample     | Visit | Inaccordance with<br>guidelines | Specify    |
|-----------|---------------------------|------------|-------|---------------------------------|------------|
| xxxxxx    | xx-xxxx                   | xxxxxxxxxx | xx    | Yes/No                          | xxxxxxxxxx |
|           |                           | xxxxxxxxxx | xx    | Yes/No                          | xxxxxxxxxx |
|           |                           | xxxxxxxxxx | xx    | Yes/No                          | xxxxxxxxxx |
| Etc       |                           |            |       |                                 |            |

Path\Filename

ALF-5755\_P2\_ALF

ddMMMyyyy

Listing 16.4.14 BP and HR Monitoring

| Treatment | Centre/<br>Patient number | Visit | Start date and time | Duration | CS worsening |
|-----------|---------------------------|-------|---------------------|----------|--------------|
| xxxxxx    | xx-xxxx                   | xxx   | ddMMMyyyy hh:mm     | hh:mm    | Yes/No       |
|           |                           | xxx   | ddMMMyyyy hh:mm     | hh:mm    | Yes/No       |
|           |                           | xxx   | ddMMMyyyy hh:mm     | hh:mm    | Yes/No       |
| Etc       |                           |       |                     |          |              |

Path\Filename

16 STUDY FLOW CHART

| Study assessment & exams                                                              | Baseline | RANDOMISATION   | H0<br>± 10 min                                                      | H12<br>± 10 min                                                     | H24<br>± 10 min                                                     | H36<br>± 10 min                                                     | H48<br>± 10 min                                                     | H60<br>± 10 min                                                     | H72<br>± 10 min                                                     | H84<br>± 10 min | D8<br>(after H0)<br>+2 days | D21<br>(after H0)<br>+2 days | Premature Discont. |   |
|---------------------------------------------------------------------------------------|----------|-----------------|---------------------------------------------------------------------|---------------------------------------------------------------------|---------------------------------------------------------------------|---------------------------------------------------------------------|---------------------------------------------------------------------|---------------------------------------------------------------------|---------------------------------------------------------------------|-----------------|-----------------------------|------------------------------|--------------------|---|
| Informed consent signed                                                               | X        |                 |                                                                     |                                                                     |                                                                     |                                                                     |                                                                     |                                                                     |                                                                     |                 |                             |                              |                    |   |
| Check Incl./excl. Criteria                                                            | X        |                 |                                                                     |                                                                     |                                                                     |                                                                     |                                                                     |                                                                     |                                                                     |                 |                             |                              |                    |   |
| Medical history                                                                       | X        |                 |                                                                     |                                                                     |                                                                     |                                                                     |                                                                     |                                                                     |                                                                     |                 |                             |                              |                    |   |
| Demographics (age, gender)                                                            | X        |                 |                                                                     |                                                                     |                                                                     |                                                                     |                                                                     |                                                                     |                                                                     |                 |                             |                              |                    |   |
| Weight, height & BMI                                                                  | X        |                 |                                                                     |                                                                     |                                                                     |                                                                     |                                                                     |                                                                     |                                                                     |                 |                             |                              |                    |   |
| Viral serologies and/or PCR (HAV, HBV, HCV, HDV, HEV, HSV, VZV, HIV)                  | X        |                 |                                                                     |                                                                     |                                                                     |                                                                     |                                                                     |                                                                     |                                                                     |                 |                             |                              |                    |   |
| Acetaminophen, alcohol plasma levels                                                  | X        |                 |                                                                     |                                                                     |                                                                     |                                                                     |                                                                     |                                                                     |                                                                     |                 |                             |                              |                    |   |
| Cupremia, ceruloplasmin plasma levels, and cupruria                                   | X        |                 |                                                                     |                                                                     |                                                                     |                                                                     |                                                                     |                                                                     |                                                                     |                 |                             |                              |                    |   |
| Autoimmune markers (ANA, ASMA, anti-LKM Ab, Ig levels)                                | X        |                 |                                                                     |                                                                     |                                                                     |                                                                     |                                                                     |                                                                     |                                                                     |                 |                             |                              |                    |   |
| Beta hCG blood pregnancy test for women of childbearing potential only                | X        |                 |                                                                     |                                                                     |                                                                     |                                                                     |                                                                     |                                                                     |                                                                     |                 |                             |                              | X                  | X |
| ALF-5755/ Placebo infusions                                                           |          |                 | Within 48 hrs after baseline                                        | X                                                                   | X                                                                   | X                                                                   | X                                                                   | X                                                                   | X                                                                   |                 |                             |                              |                    |   |
| Clinical examination                                                                  | X        |                 | Before, 10 min after infusion                                       | Before, 10 min after infusion                                       | Before, 10 min after infusion                                       | Before, 10 min after infusion                                       | Before, 10 min after infusion                                       | Before, 10 min after infusion                                       | Before, 10 min after infusion                                       | X               | X                           | X                            | X                  | X |
| Vital signs (BP, HR, RR)                                                              | X        |                 | Before infusion, 10 min + HR and BP only during 1 hr after infusion | Before infusion, 10 min + HR and BP only during 1 hr after infusion | Before infusion, 10 min + HR and BP only during 1 hr after infusion | Before infusion, 10 min + HR and BP only during 1 hr after infusion | Before infusion, 10 min + HR and BP only during 1 hr after infusion | Before infusion, 10 min + HR and BP only during 1 hr after infusion | Before infusion, 10 min + HR and BP only during 1 hr after infusion | X               | X                           | X                            | X                  | X |
| Body temperature                                                                      | X        |                 | Before infusion                                                     | Before infusion                                                     | Before infusion                                                     | Before infusion                                                     | Before infusion                                                     | Before infusion                                                     | Before infusion                                                     | X               | X                           | X                            | X                  | X |
| ECG                                                                                   | X        |                 | Before, 10 min and 1 hr after infusion                              |                                                                     | Before, 10 min and 1 hr after infusion                              |                                                                     | Before, 10 min and 1 hr after infusion                              |                                                                     | Before, 10 min and 1 hr after infusion                              | X               | X                           | X                            | X                  | X |
| Hepatic Encephalopathy grade & GCS                                                    | X        |                 | Before infusion                                                     | Before infusion                                                     | Before infusion                                                     | Before infusion                                                     | Before infusion                                                     | Before infusion                                                     | Before infusion                                                     | X               | X                           | X                            | X                  | X |
| Arterial blood gas with lactates: if grade I or II hepatic encephalopathy or GCS < 15 |          |                 |                                                                     |                                                                     |                                                                     |                                                                     |                                                                     |                                                                     |                                                                     |                 |                             |                              |                    |   |
| PR, FV, INR, ALT, AST                                                                 | X        |                 | Before infusion                                                     | Before infusion                                                     | Before infusion                                                     | Before infusion                                                     | Before infusion                                                     | Before infusion                                                     | Before infusion                                                     | X               | X                           | X                            | X                  | X |
| Haematology, Biochemistry                                                             | X        |                 | Before infusion                                                     | Before infusion                                                     | Before infusion                                                     | Before infusion                                                     | Before infusion                                                     | Before infusion                                                     | Before infusion                                                     | X               | X                           | X                            | X                  | X |
| Urinalysis                                                                            |          | Before infusion |                                                                     | Before infusion                                                     |                                                                     | Before infusion                                                     |                                                                     | Before infusion                                                     | X                                                                   |                 | X                           | X                            | X                  |   |
| Anti-ALF-5755 antibodies <sup>1</sup>                                                 |          | Before infusion |                                                                     |                                                                     |                                                                     |                                                                     |                                                                     |                                                                     |                                                                     |                 | X                           | X                            |                    |   |

|                                                           |   |  |                 |                 |                 |                 |                 |                 |   |   |   |   |   |
|-----------------------------------------------------------|---|--|-----------------|-----------------|-----------------|-----------------|-----------------|-----------------|---|---|---|---|---|
| Concomitant medications & AE recording (from signed PICD) | X |  | X               | X               | X               | X               | X               | X               | X | X | X | X | X |
| CK18 (only at Paul Bousse and Beaujon hospital)           |   |  | Before infusion | Before infusion | Before infusion | Before infusion | Before infusion | Before infusion | X | X |   |   | X |

ALF-5755 plasma concentrations:

| H0                                           | H0 10 min                               | H1 | H2 | H6 | H12                                          | H48                                          | H60                                          | H60 10 min                              | H61 | H62 | H66 | H72 | H84 | Premature<br>discont. |
|----------------------------------------------|-----------------------------------------|----|----|----|----------------------------------------------|----------------------------------------------|----------------------------------------------|-----------------------------------------|-----|-----|-----|-----|-----|-----------------------|
| X<br>just before 1 <sup>st</sup><br>infusion | X<br>end of 1 <sup>st</sup><br>infusion | X  | X  | X  | X<br>just before 2 <sup>nd</sup><br>infusion | X<br>just before 5 <sup>th</sup><br>infusion | X<br>just before 6 <sup>th</sup><br>infusion | X<br>end of 6 <sup>th</sup><br>infusion | X   | X   | X   | X   | X   | X                     |
